# Supplementary material for: Evolutionary engineering of Saccharomyces cerevisiae: Crafting a synthetic methylotroph via self-reprogramming
Source: PubMed Central journal article supplement — Sci Adv. 2024 Dec 20;10(51):eadq3484. doi: 10.1126/sciadv.adq3484 (PMC11661404; doi:10.1126/sciadv.adq3484), 2024-12-20
Supplement: sciadv.adq3484_sm.pdf [file sciadv.adq3484_sm.pdf]

Supplementary Materials for  
**Evolutionary engineering of *Saccharomyces cerevisiae*: Crafting a synthetic  
methylotroph via self-reprogramming**

Feng Guo *et al.*

Corresponding author: Fengxue Xin, xinfengxue@njtech.edu.cn; Wenming Zhang, zhangwm@njtech.edu.cn

*Sci. Adv.* **10**, eadq3484 (2024)  
DOI: 10.1126/sciadv.adq3484

**The PDF file includes:**

Figs. S1 to S27  
Tables S1 to S5  
Legends for data S1 and S2

**Other Supplementary Material for this manuscript includes the following:**

Data S1 and S2

Supplementary Figures

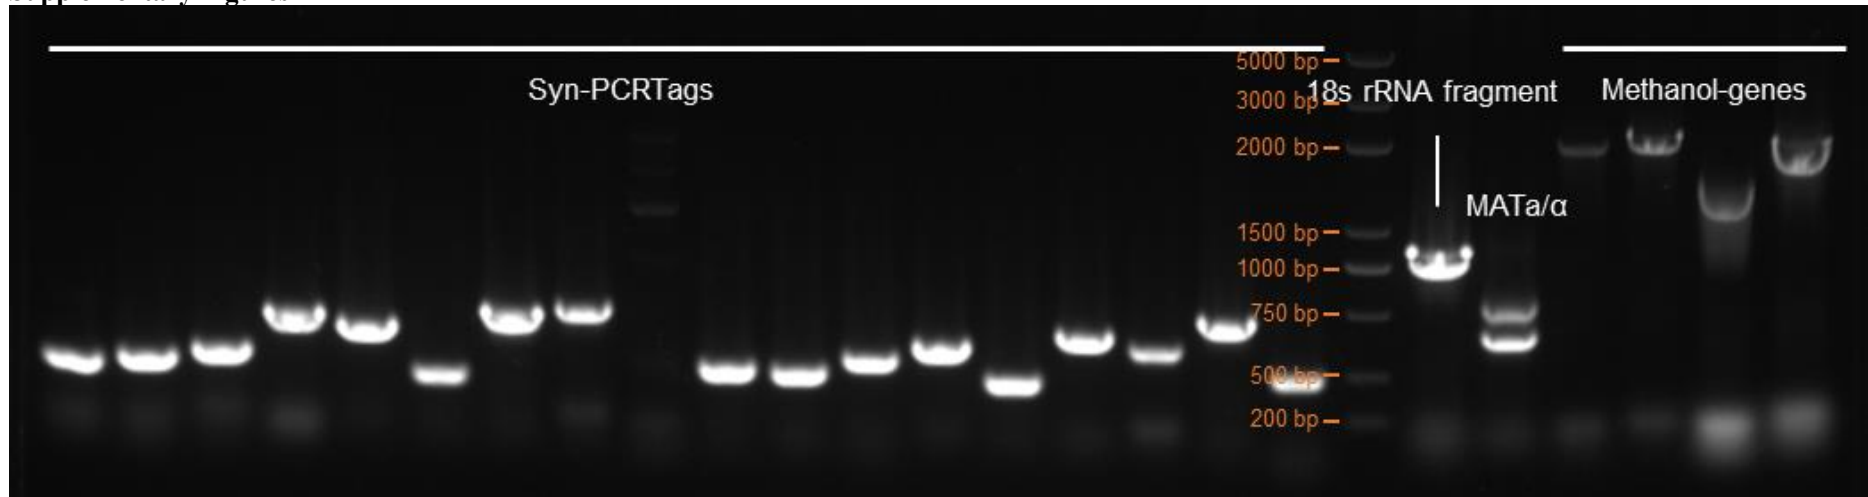

Fig. S1. PCRTag analysis for diploids demonstrates that SCDM001 contained both the synthetic chromosome and the methanol assimilation pathway.

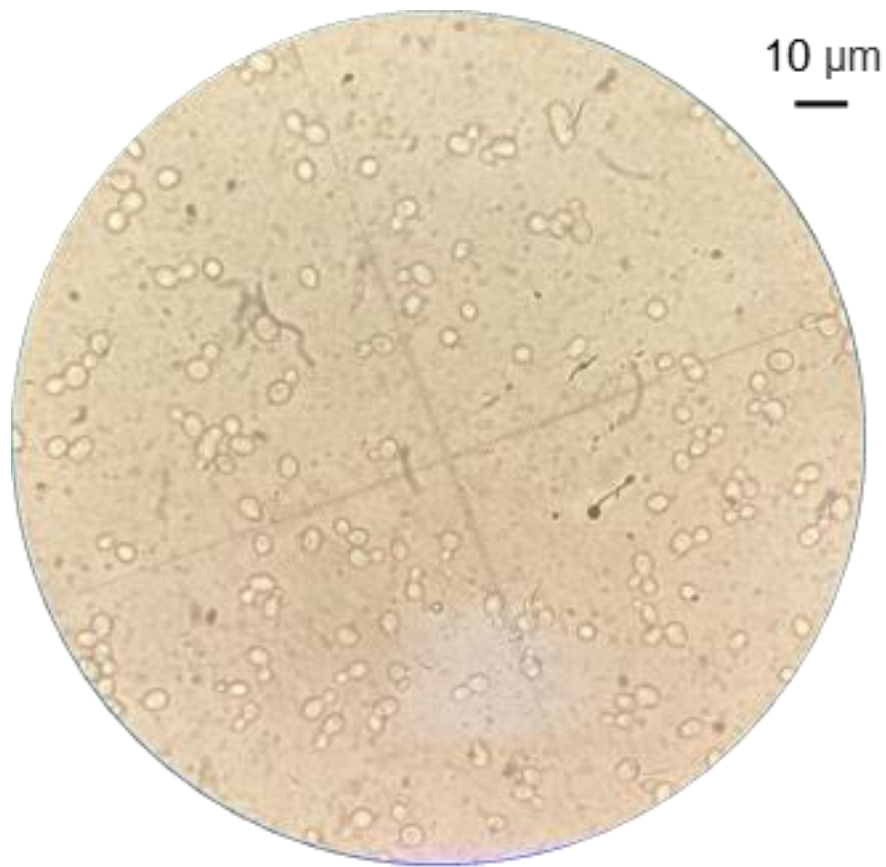

SCHapMet

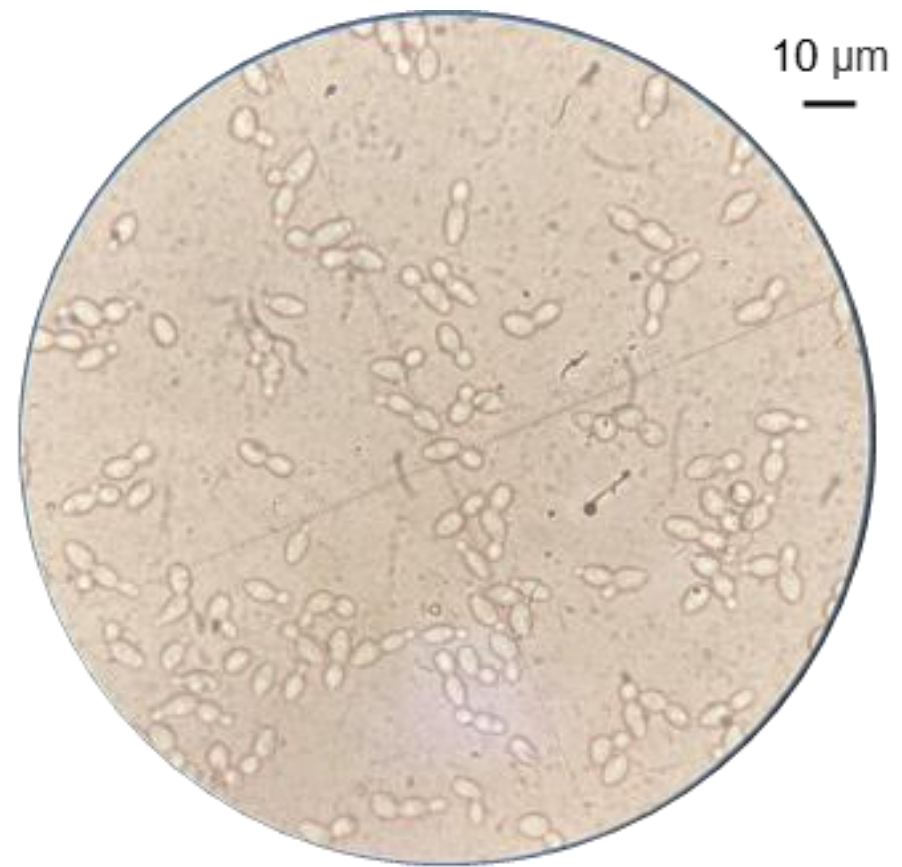

SCDM001

**Fig. S2. Comparison of cell morphology of haploid SCHapMet and diploid SCDM001.**

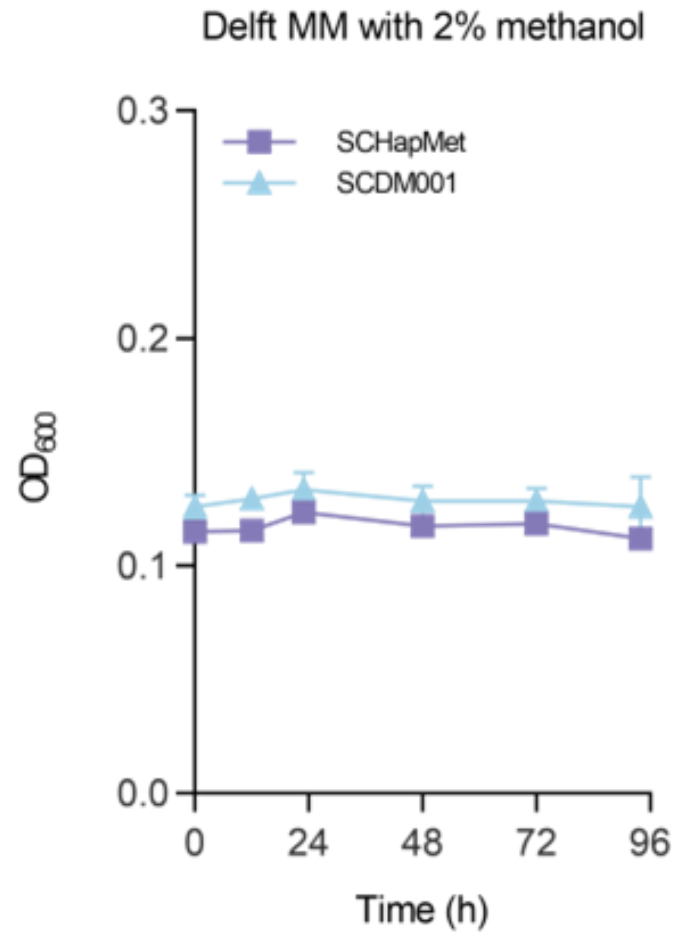

**Fig. S3. Growth curves of the haploid methanol-utilizing strain SCHapMet and diploid methanol-utilizing strain SCDM001 in Delft MM with 2% methanol.** All data are presented as mean  $\pm$  s.d. Triplicate independent samples were adopted for each panel.

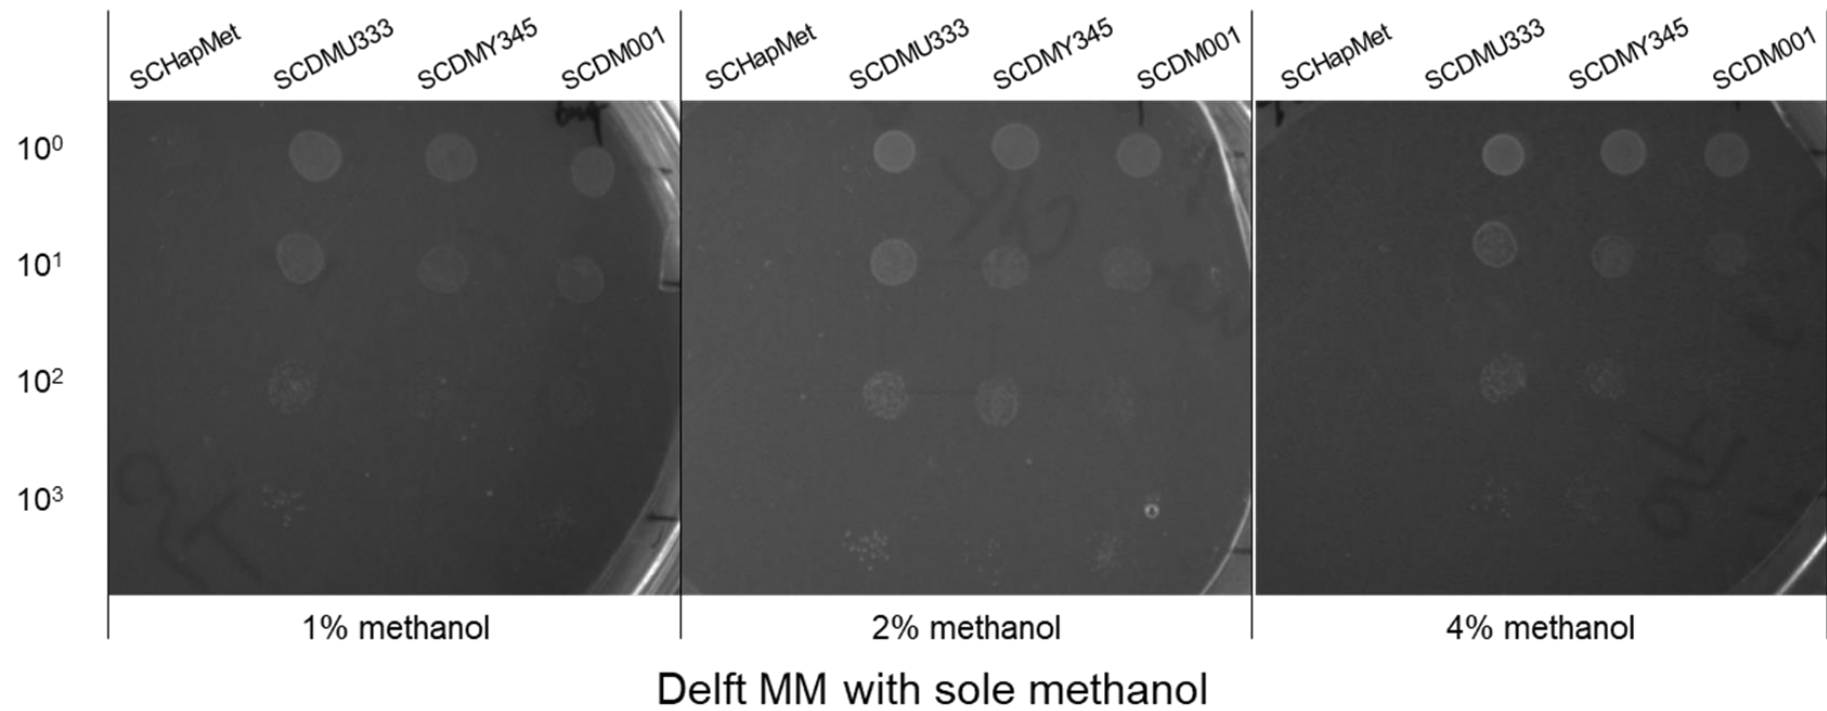

Fig. S4. Serial dilution assay comparing the growth of the SCRaMbLEd strain on Delft MM with 1%, 2%, and 4% methanol.

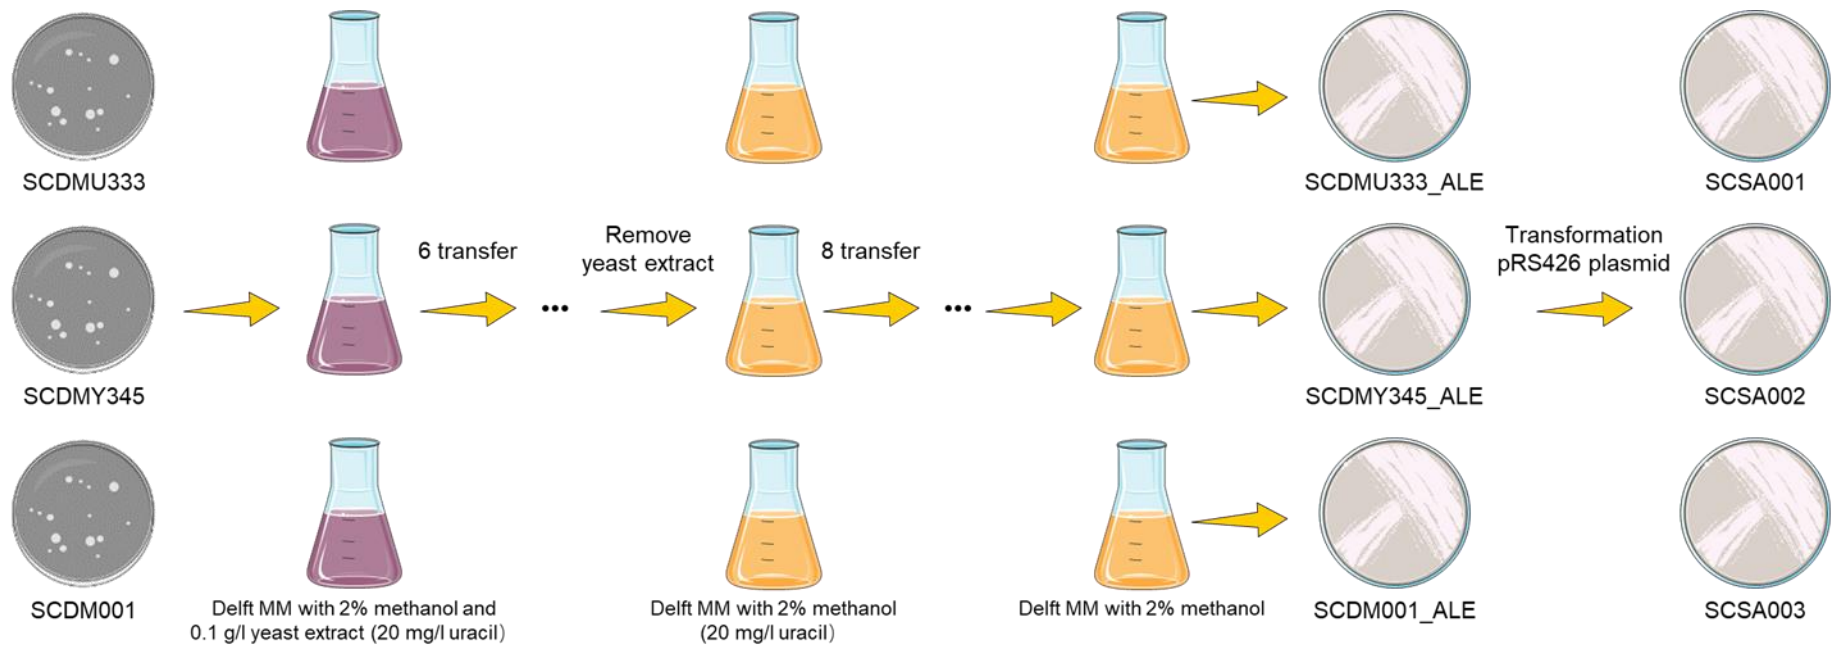

**Fig. S5. Workflow for ALE of strain SCDMU333, SCDMY345, and SCDM001.** Strains were cultivated in Delft MM with 2% methanol and 0.1 g/l yeast extract (20 mg/l uracil was supplemented to compensate for uracil auxotroph). After 7 passages, the strains were transferred to Delft MM with 2% methanol (20 mg/l uracil was supplemented to compensate for uracil auxotroph, removing the addition of yeast extract). If the  $OD_{600}$  achieved up to 0.4 or a single culture reached 7 days, the evolved strains were transferred to a new medium. until the strains could reach a stable growth rate in the Delft MM containing 2% sole methanol. Finally, the empty pRS426 plasmid was transformed into the evolved strains, generating strain SCSA001, SCSA002, and SCSA003.

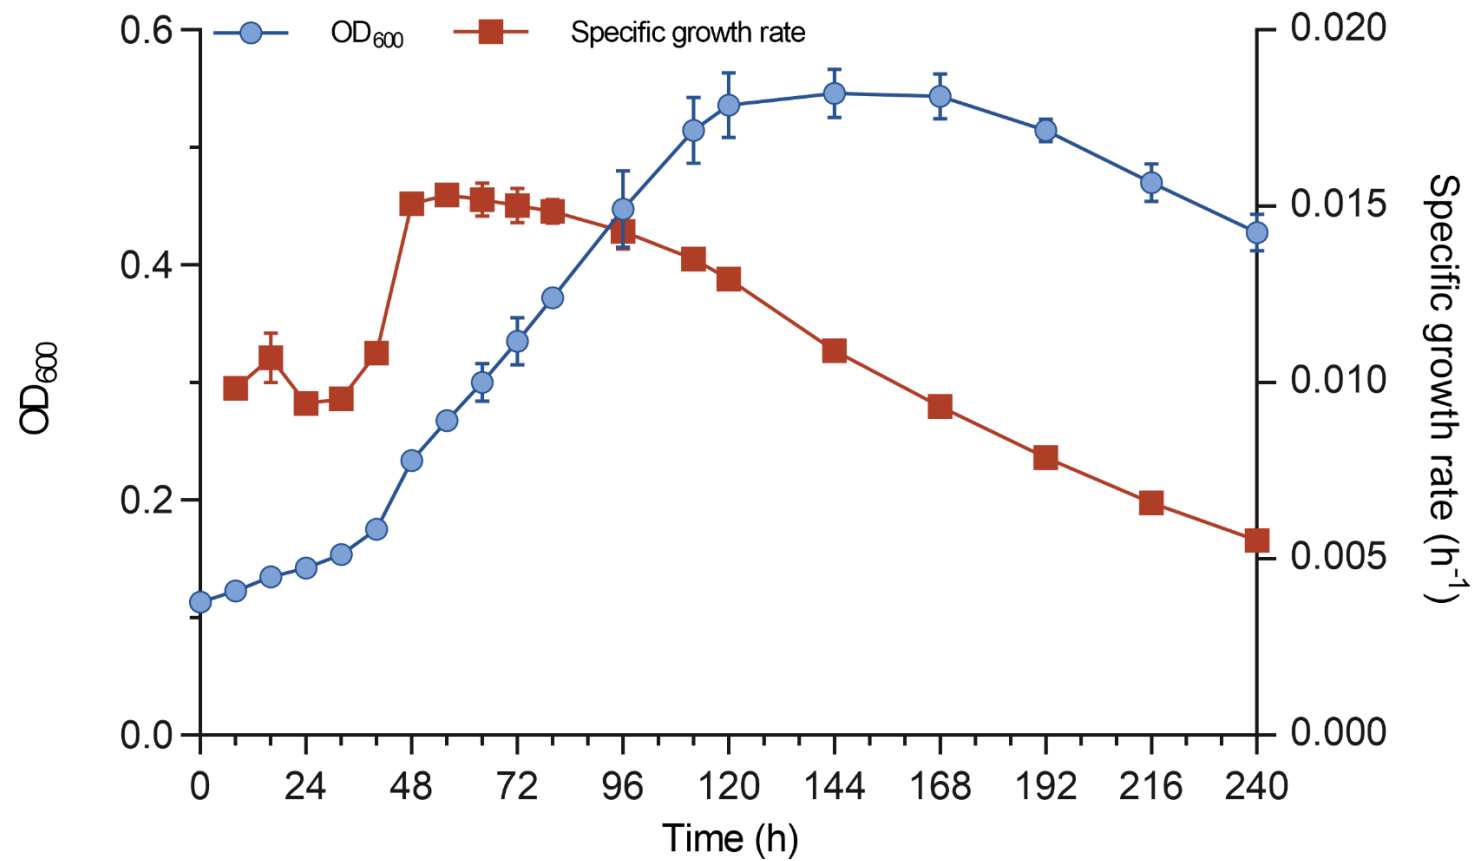

**Fig. S6. Growth curves and specific growth rate of strain SCSA001 in Delft MM containing 2% methanol.** The specific growth rate at any given point is calculated based on the growth from 0 hours to that time. All strains were precultured in YPD medium and washed twice using PBS (pH = 7.2) before cultivated in Delft MM. All data represent the mean  $\pm$  s.d. (n = 3 biologically independent samples).

**A**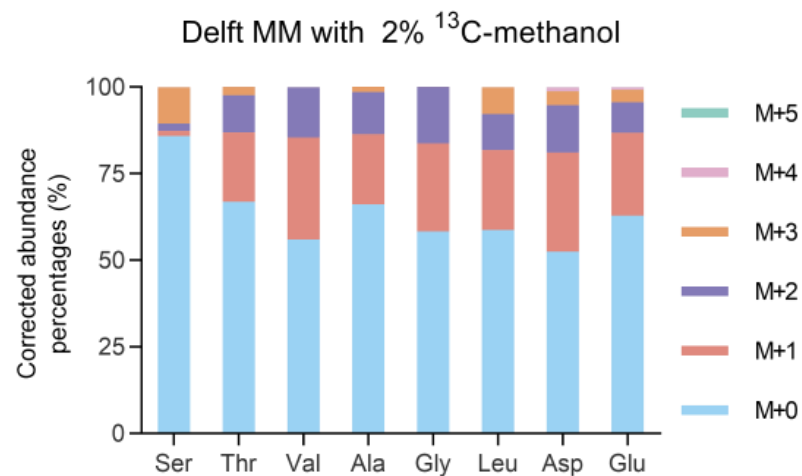**B**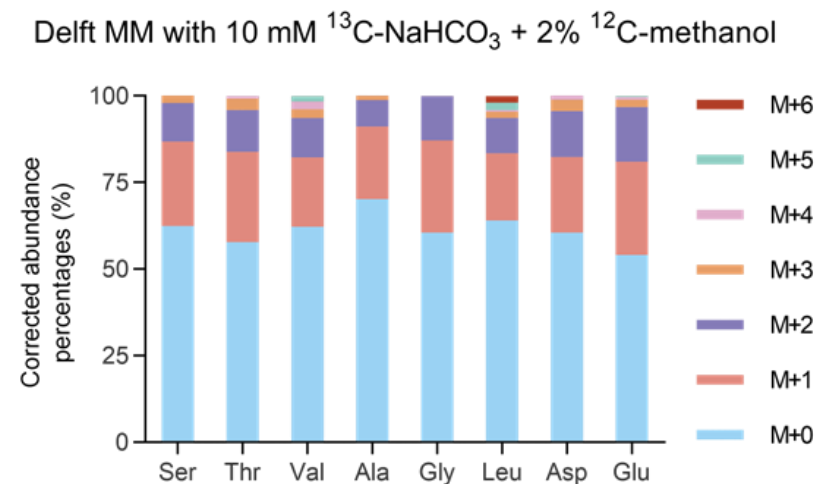

**Fig. S7. Labelling pattern of amino acids in SCSA001 strain in Delft MM with 2%  $^{13}\text{C}$ -methanol. (A) and 10 mM  $^{13}\text{C}$ - $\text{NaHCO}_3$  + 2%  $^{12}\text{C}$ -methanol (B); M + N, where M represents the nominal mass of the unlabeled metabolite and N indicates the total  $^{13}\text{C}$ -labelled carbon numbers in the metabolite. Strain SCSA001 was precultured in Delft MM with  $^{13}\text{C}$ -labelled methanol three times before being cultured in Delft MM with  $^{13}\text{C}$ -labelled methanol. All data are presented as mean. Triplicate independent samples were adopted for each panel.**



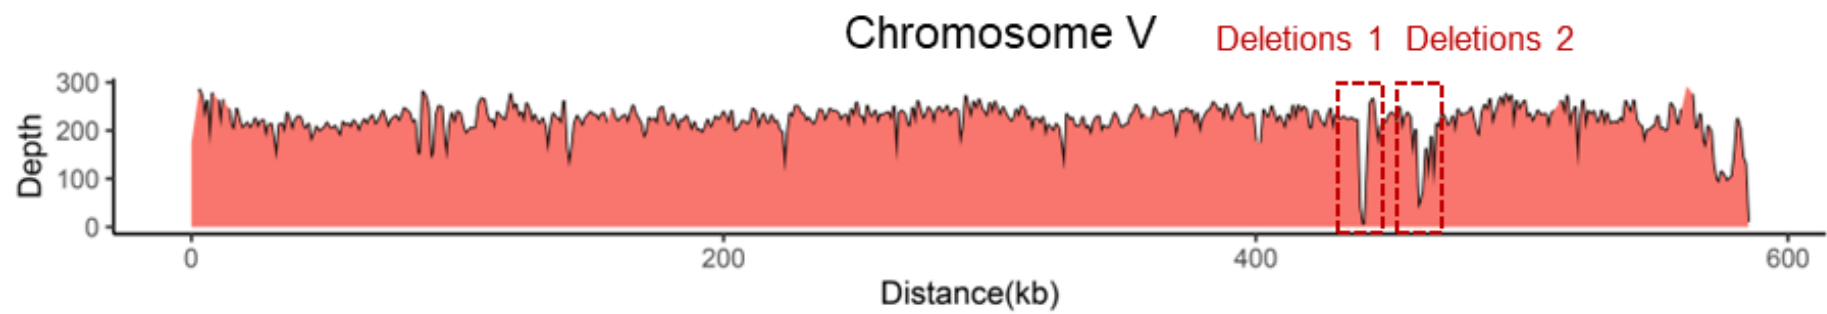

**Fig. S8.** Average sequencing depth per segment along synV of SCSA001. Two deletions are highlighted.

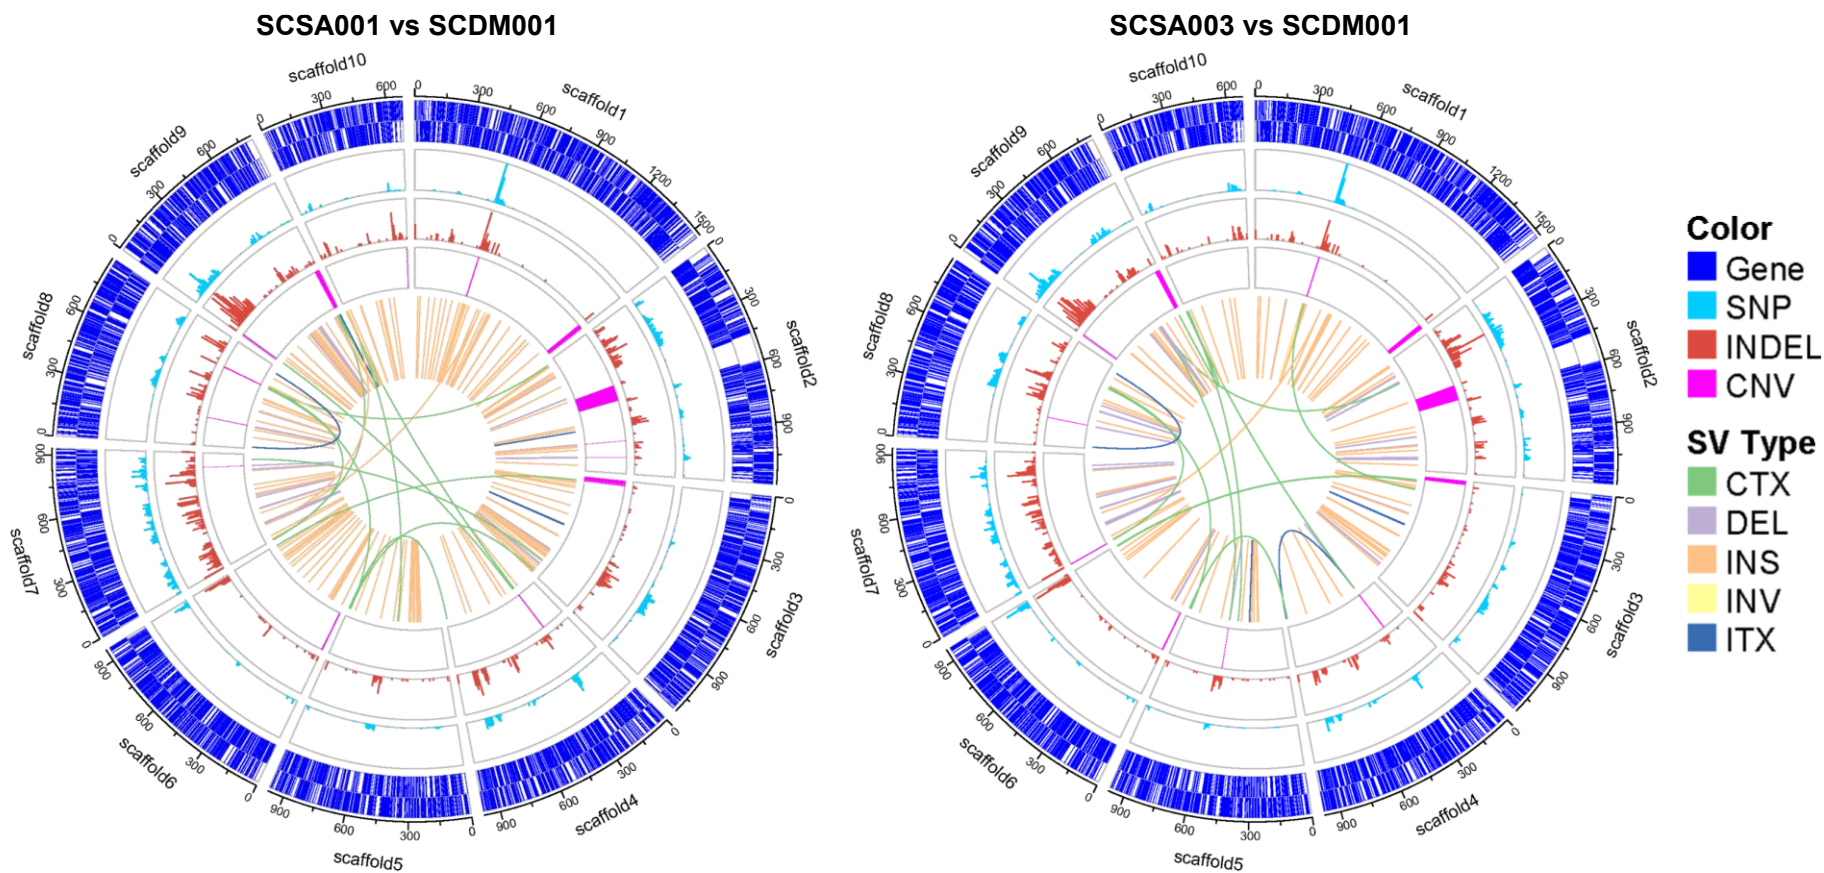

| Mutation type | Exonic SNP | InDel     |          | CNV      |             | SV                              |          |           |           |                                 |
|---------------|------------|-----------|----------|----------|-------------|---------------------------------|----------|-----------|-----------|---------------------------------|
|               |            | Insertion | Deletion | deletion | duplication | Inter-chromosomal translocation | Deletion | Insertion | Inversion | Intra-chromosomal translocation |
| SCSA001       | 12,796     | 903       | 1,343    | 14       | 10          | 15                              | 47       | 187       | 6         | 12                              |
| SCSA003       | 12,315     | 961       | 1,375    | 11       | 6           | 17                              | 55       | 108       | 4         | 9                               |

**Fig. S9. Whole genome sequencing statistics of strains SCSA003 and SCSA001.** Strain SCDM001 was used as the reference genome for comparative analysis.

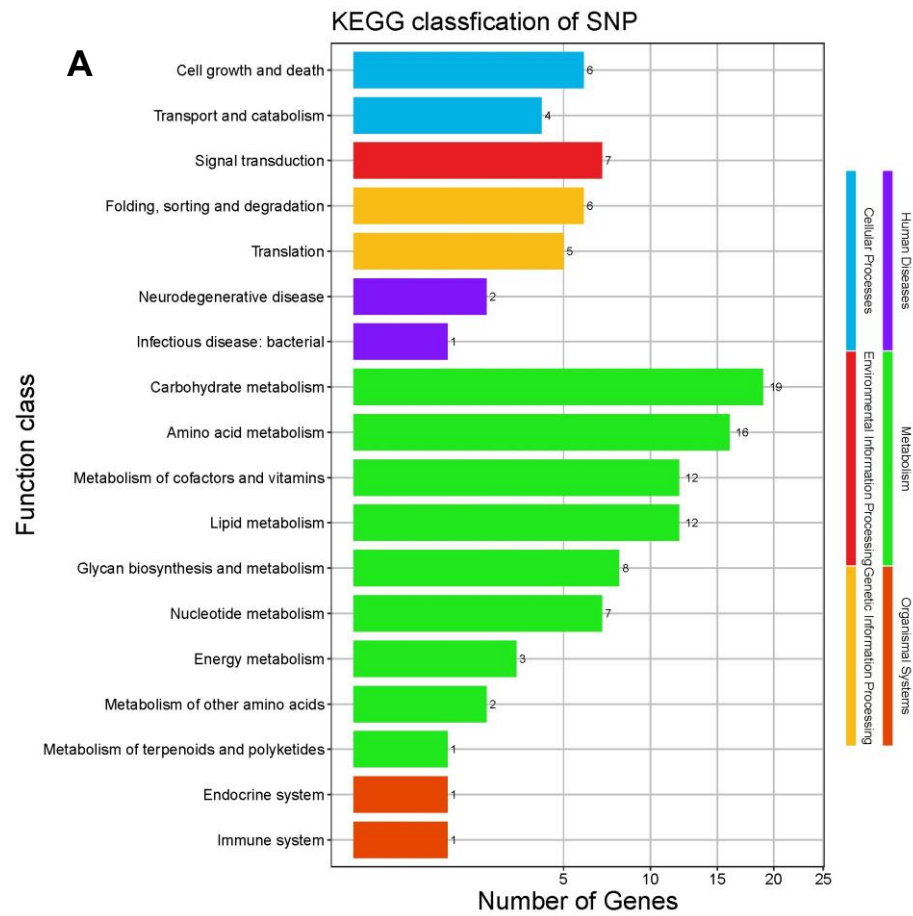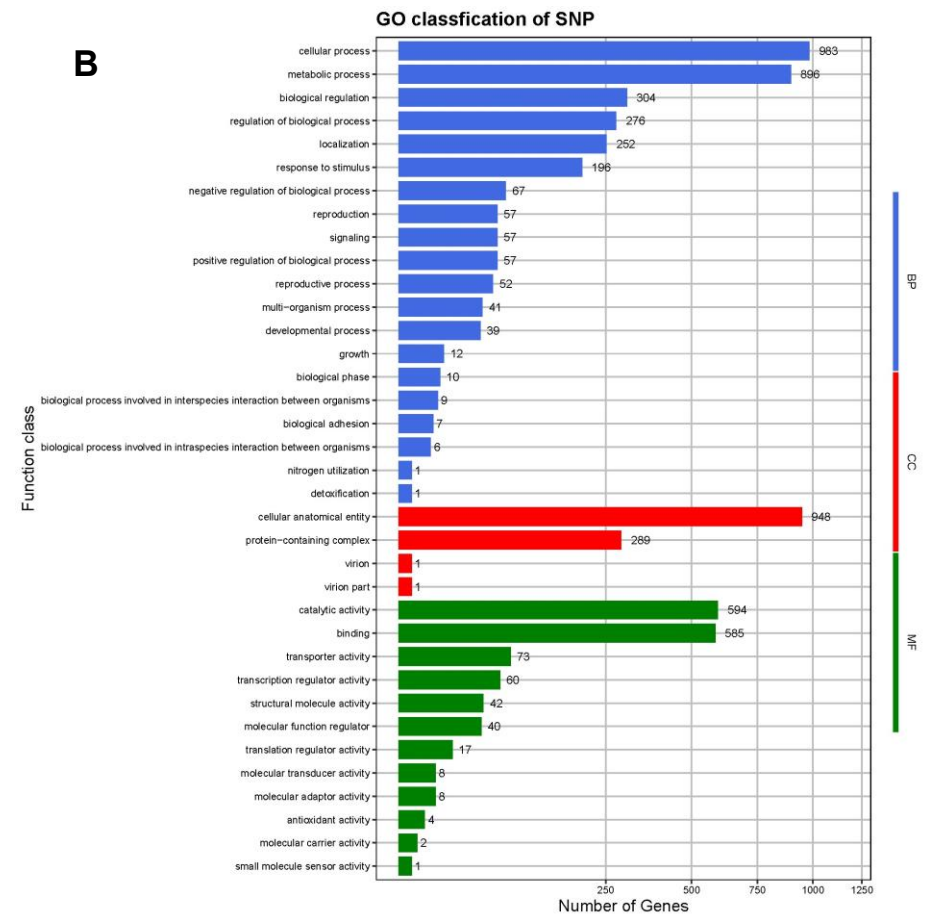

**Fig. S10. KEGG pathways and GO enrichment analysis of SNPs in strain SCSA001. (A) KEGG classification of SNPs; (B) GO classification of SNPs.**

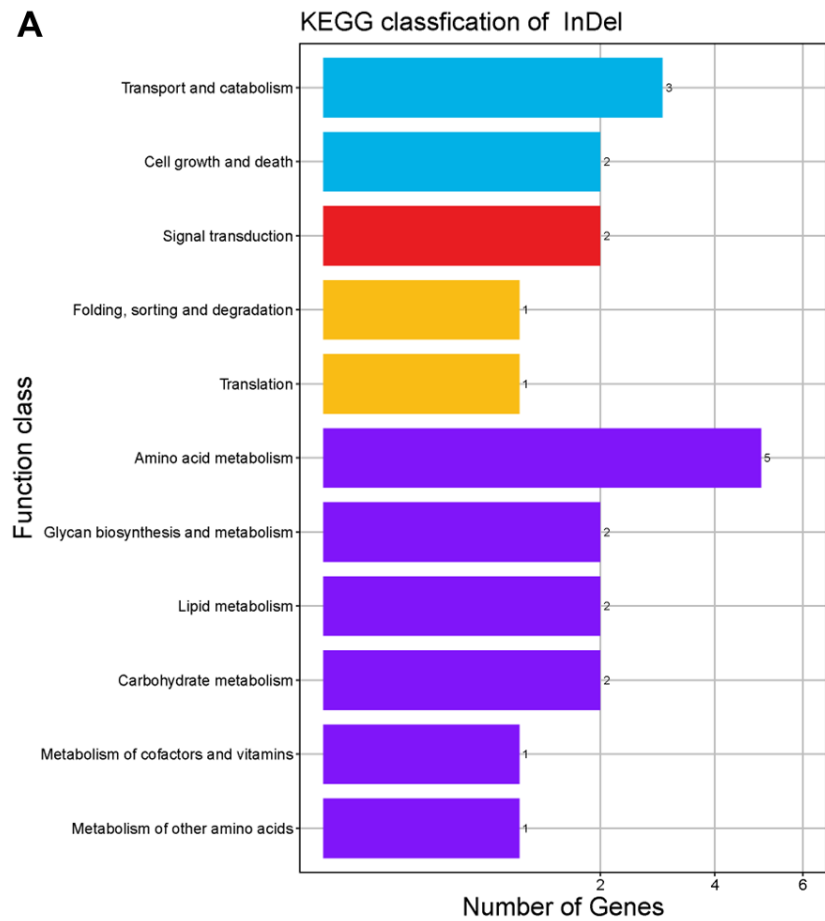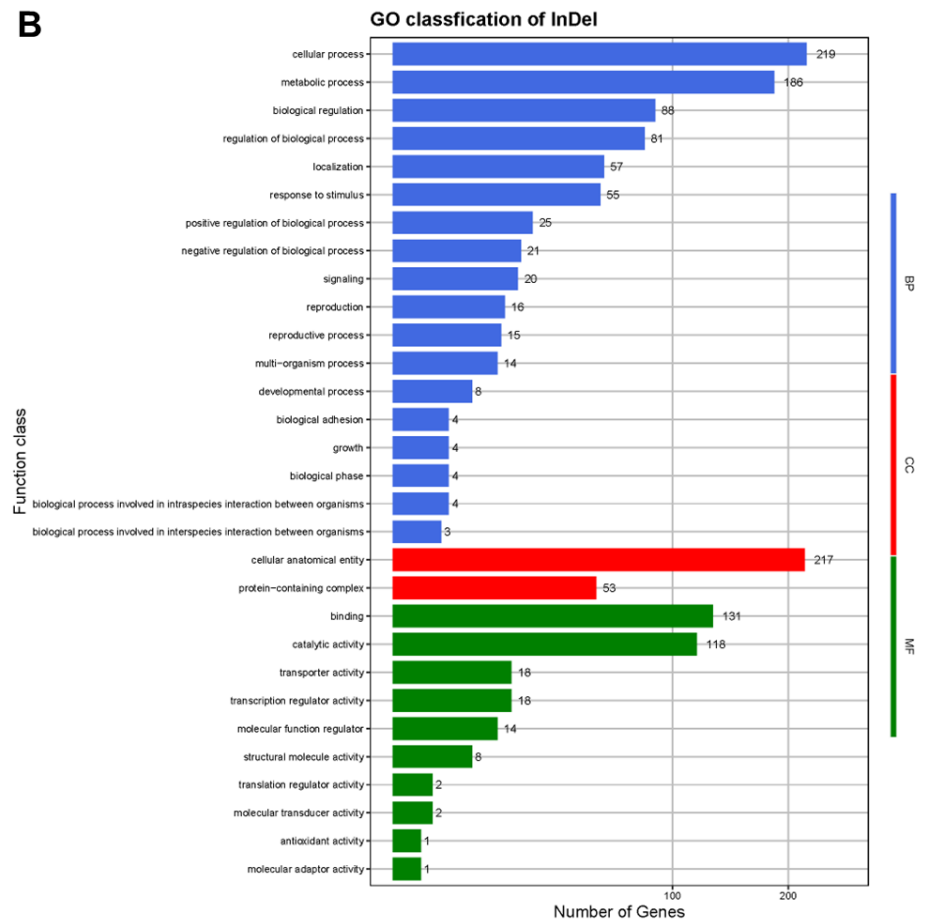

**Fig. S11. KEGG pathways and GO enrichment analysis of InDels in strain SC5A001.** (A) KEGG classification of InDels; (B) GO classification of InDels.

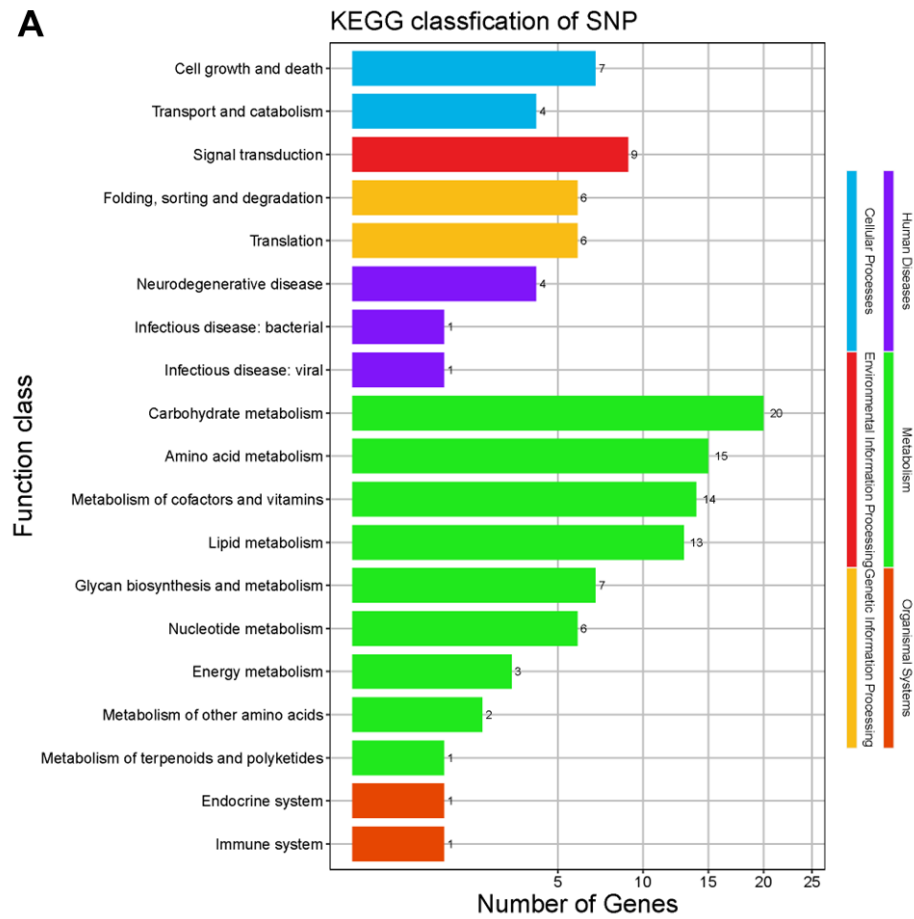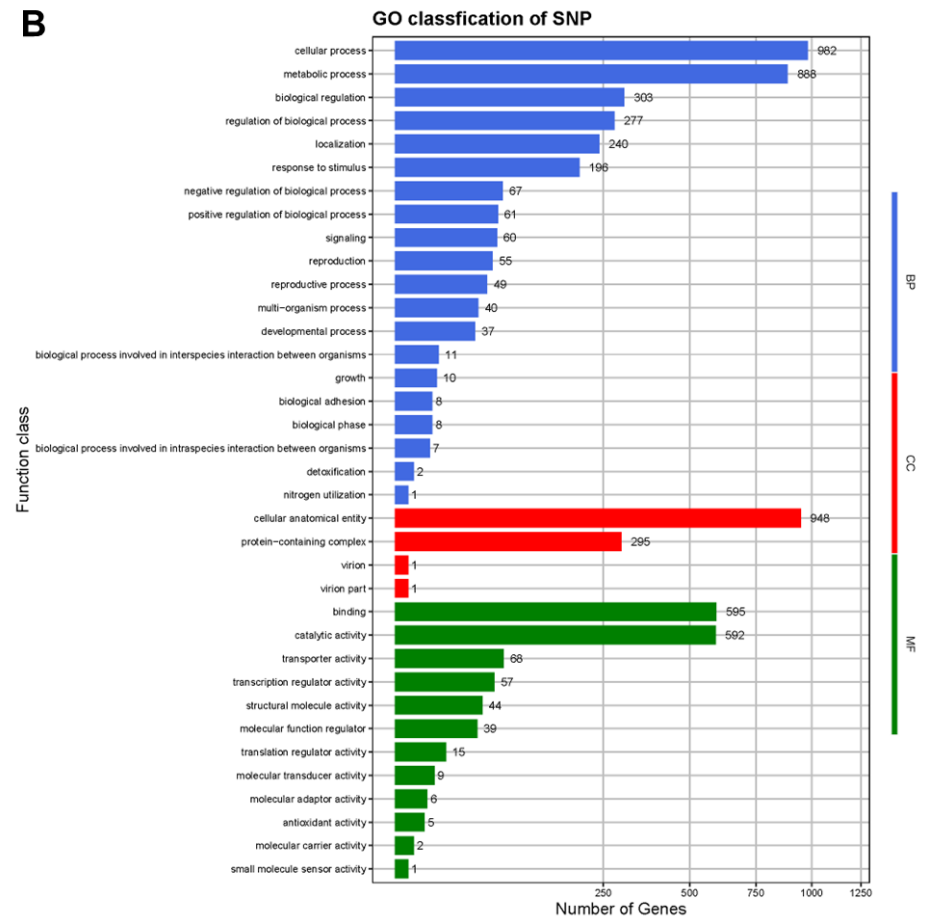

**Fig. S12. KEGG pathways and GO enrichment analysis of SNPs in strain SCSA003. (A) KEGG classification of SNPs; (B) GO classification of SNPs.**

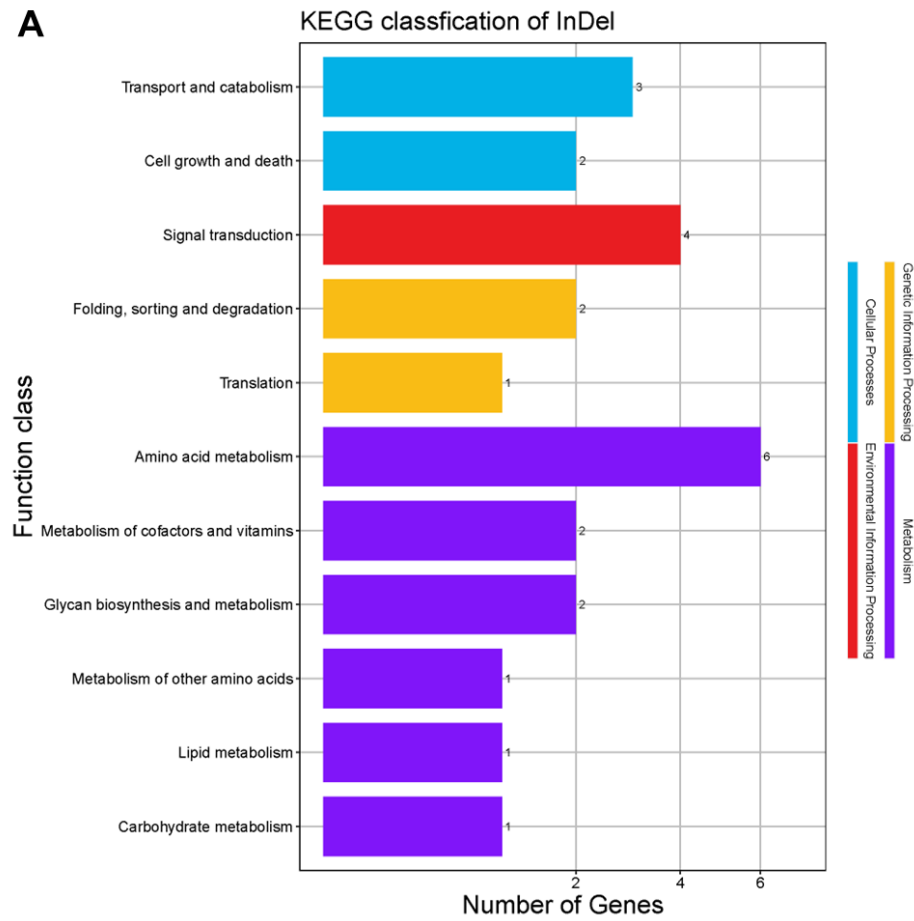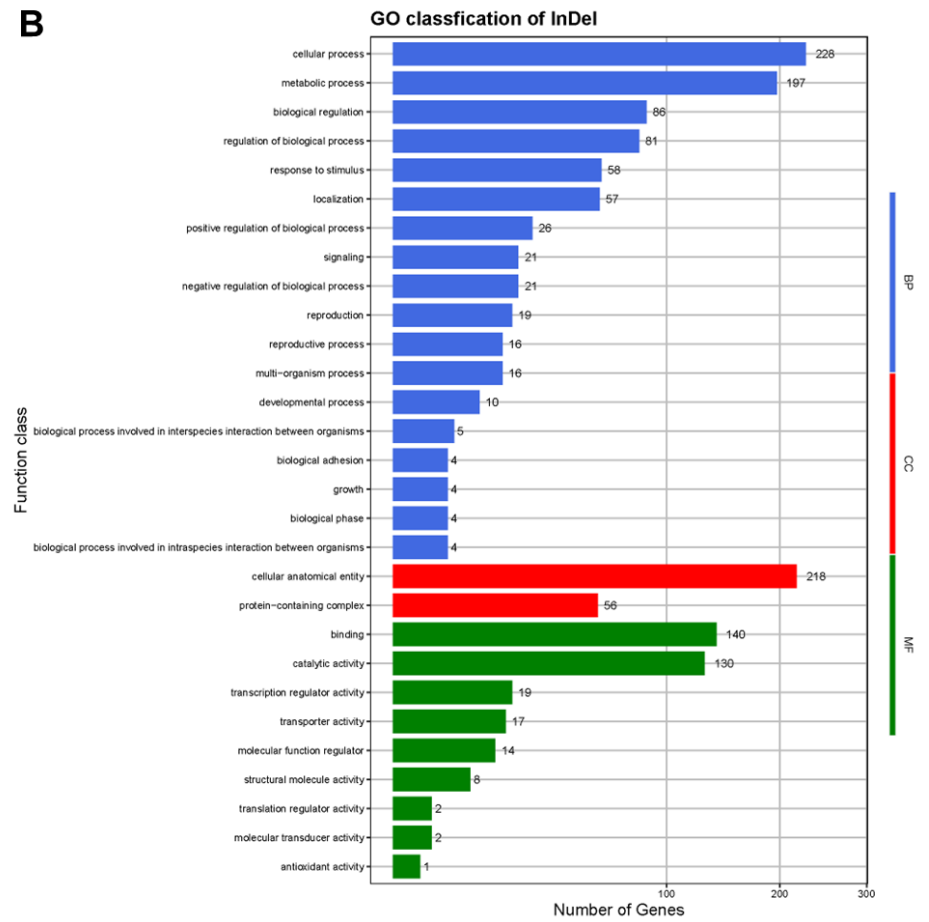

**Fig. S13. KEGG pathways and GO enrichment analysis of InDels in strain SC5A003.** (A) KEGG classification of InDels; (B) GO classification of InDels.

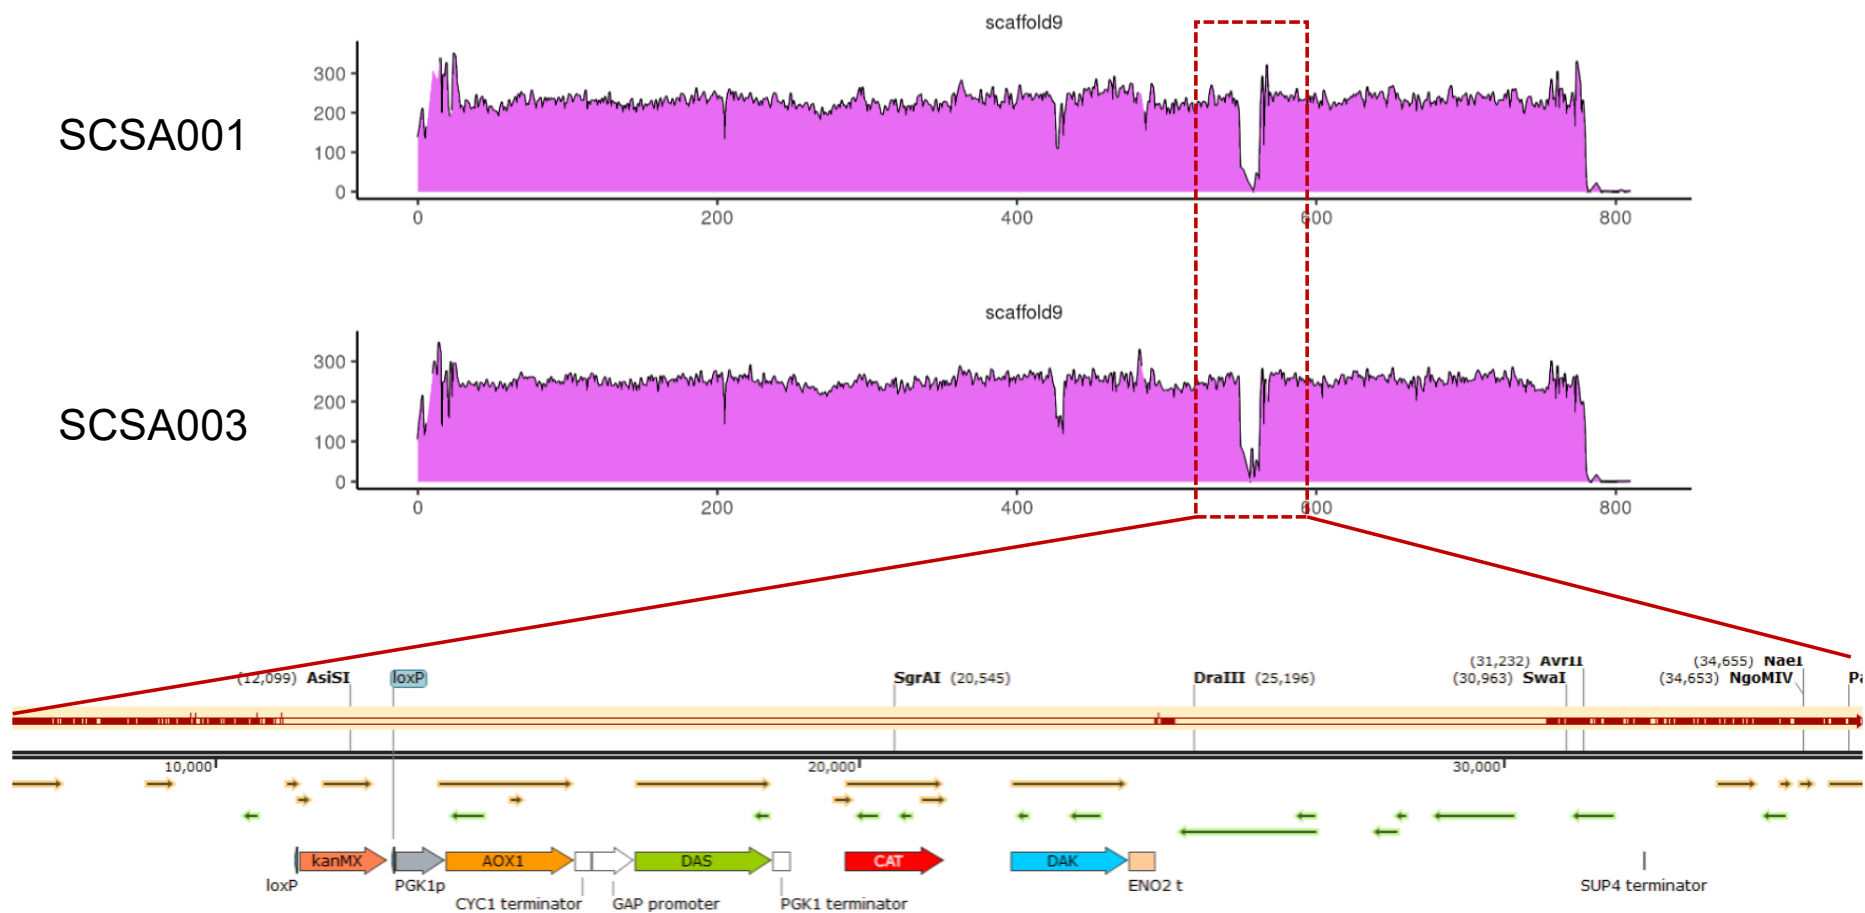

Fig. S14. Whole-genome sequencing reveals the complete eradication of the *P. pastoris*-derived methanol assimilation module in ALE-adapted strains SCSA001 and SCSA003.

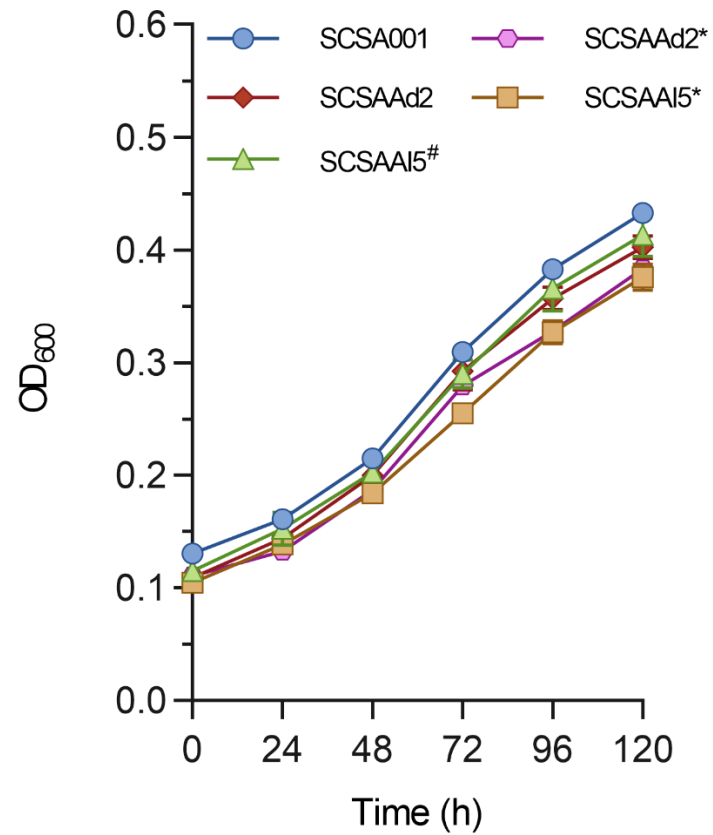

**Fig. S15. Growth curves of strain SCSA001, SCSAAd2, SCSAAI5#, SCSAAd2\* and SCSAAI5\* in Delft MM with 2% methanol.** All strains were precultured in YPD medium and washed twice using PBS (pH = 7.2) before cultivated in Delft MM. All data represent the mean  $\pm$  s.d. (n = 3 biologically independent samples).



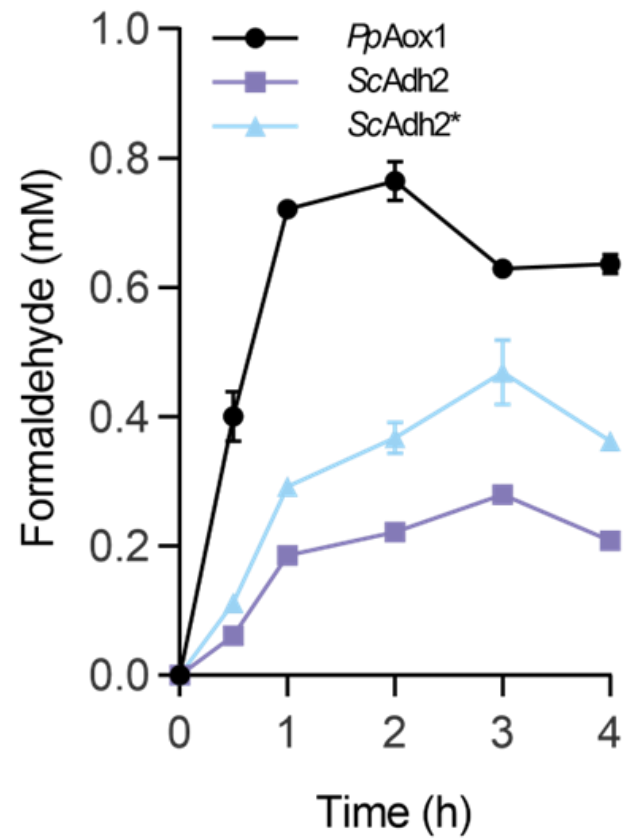

**Fig. S16.** Measurement of *in vitro* activities of Adh2, Adh2\* and PpAox1 enzymes. All data are presented as mean  $\pm$  s.d. Triplicate independent samples were adopted for each panel.

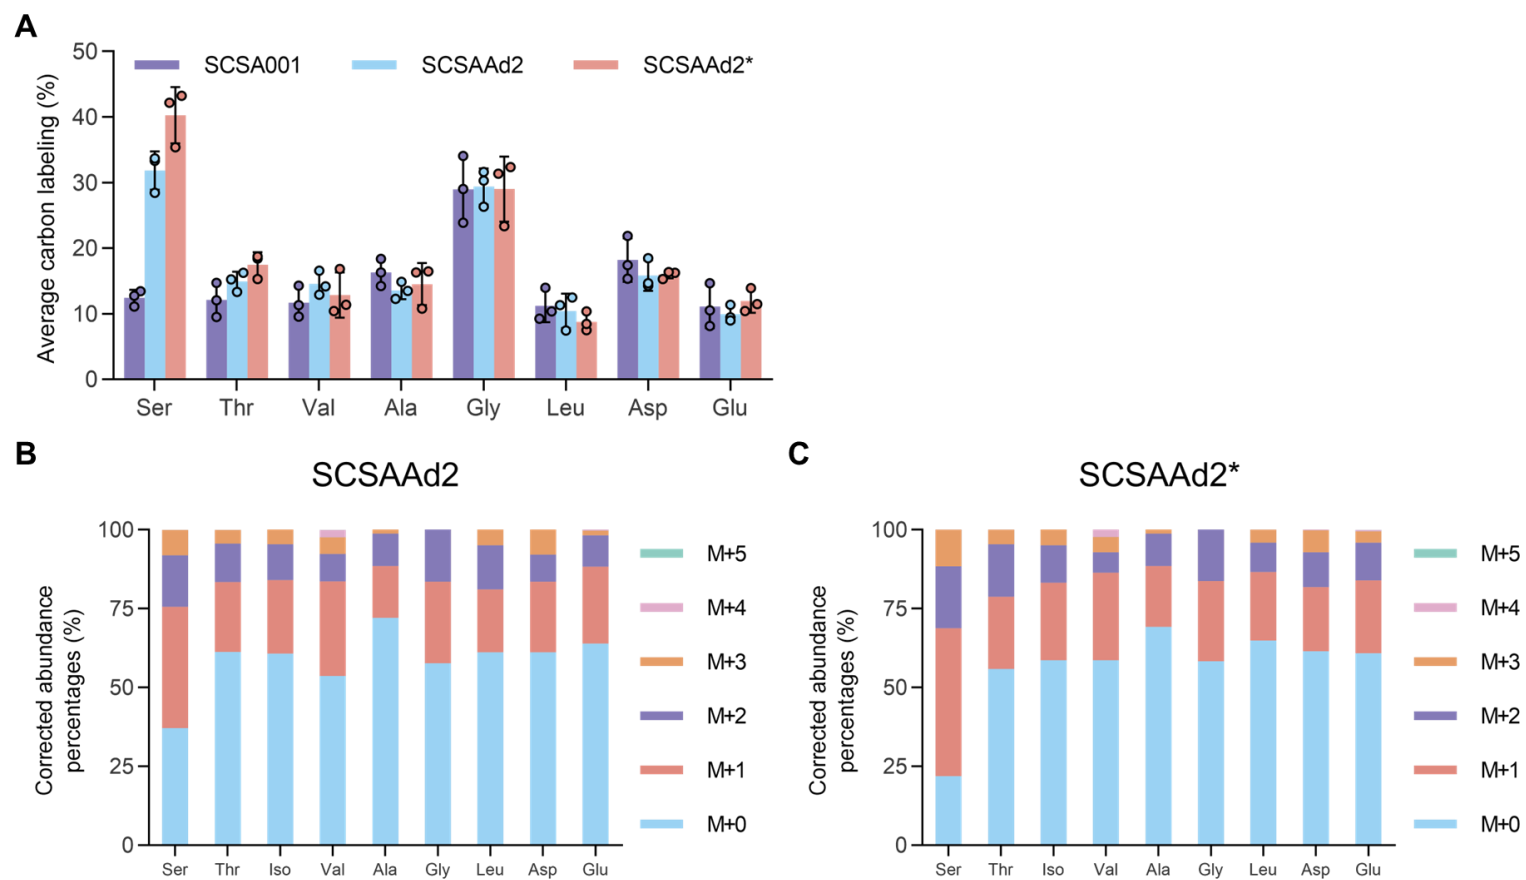

**Fig. S17. Effects of Adh2 and Adh2\* expression on amino acid synthesis in evolved strain SCSA001.** (A) The average carbon labeling of amino acids of SCSA001, SCSAAd2, and SCSAAd2\* in Delft MM supplemented with  $^{13}\text{C}$ -labelled methanol. Strains were precultured in Delft MM with  $^{13}\text{C}$ -labelled methanol three times before being cultured for *in vivo*  $^{13}\text{C}$ -methanol metabolic tracer assays. (B and C) Labelling pattern of amino acids in SCSAAd2 and SCSAAd2\*; M + N, where M represents the nominal mass of the unlabeled metabolite and n indicates the total  $^{13}\text{C}$ -labelled carbon numbers in the metabolite. Strain SCSAAd2 and SCSAAd2\* were precultured in Delft MM with  $^{13}\text{C}$ -labelled methanol three times before being cultured in Delft MM with  $^{13}\text{C}$ -labelled methanol. All data are presented as mean. Triplicate independent samples were adopted for each panel.

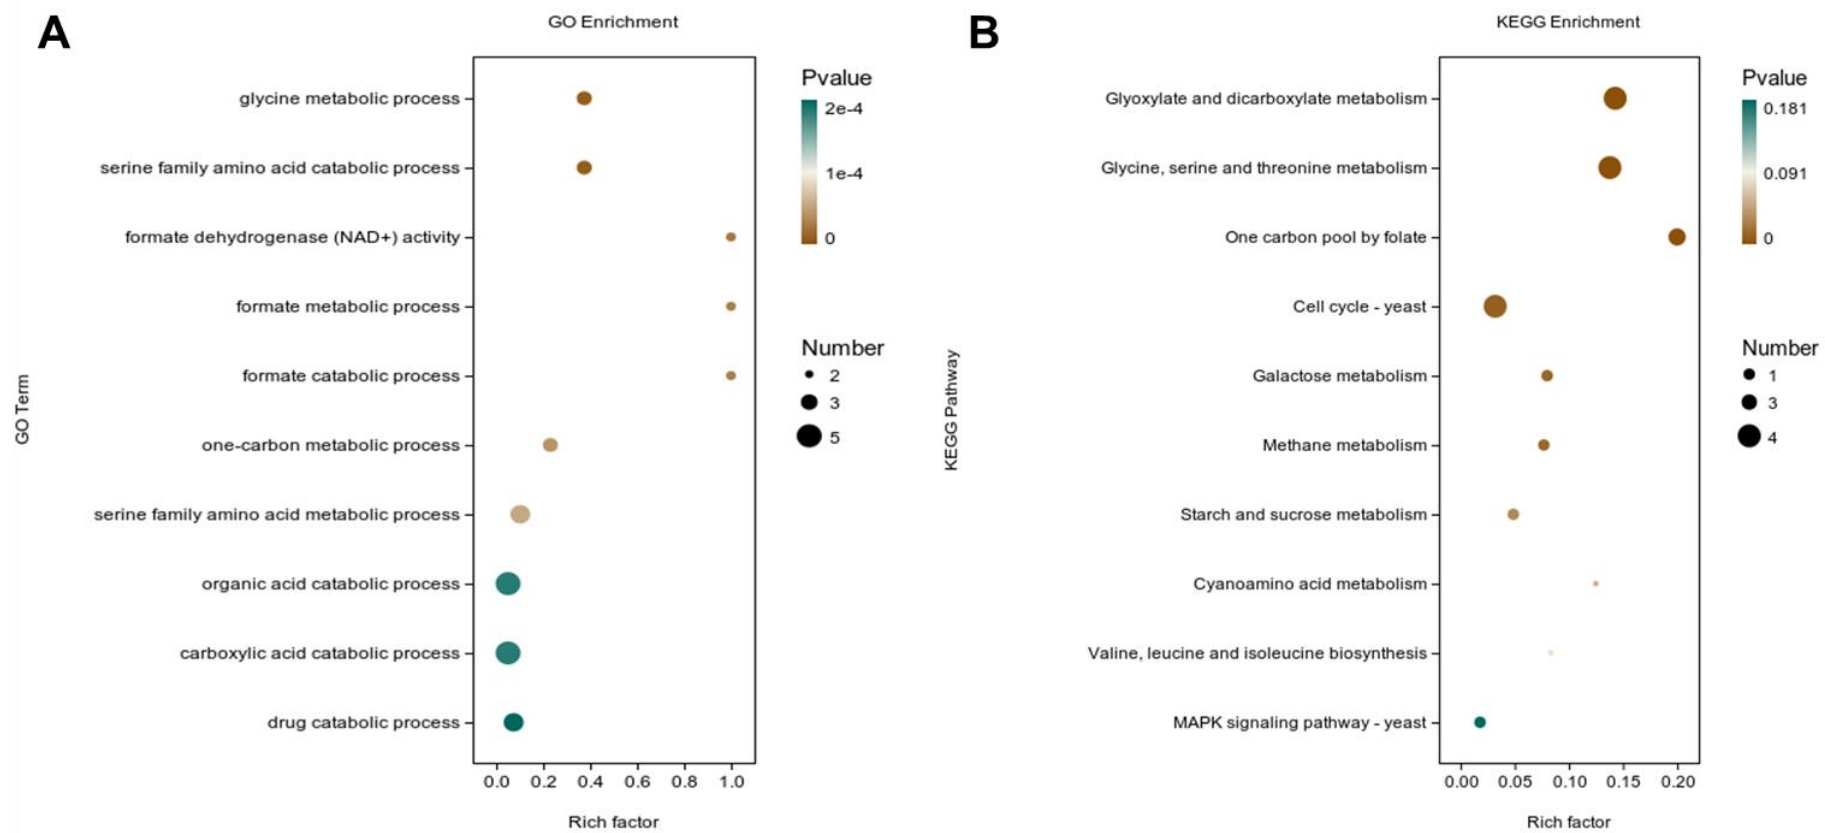

**Fig. S18. GO and KEGG pathway enrichment analysis of the different expressed genes.** (A) GO pathway enrichment analysis; (B) KEGG pathway enrichment analysis.

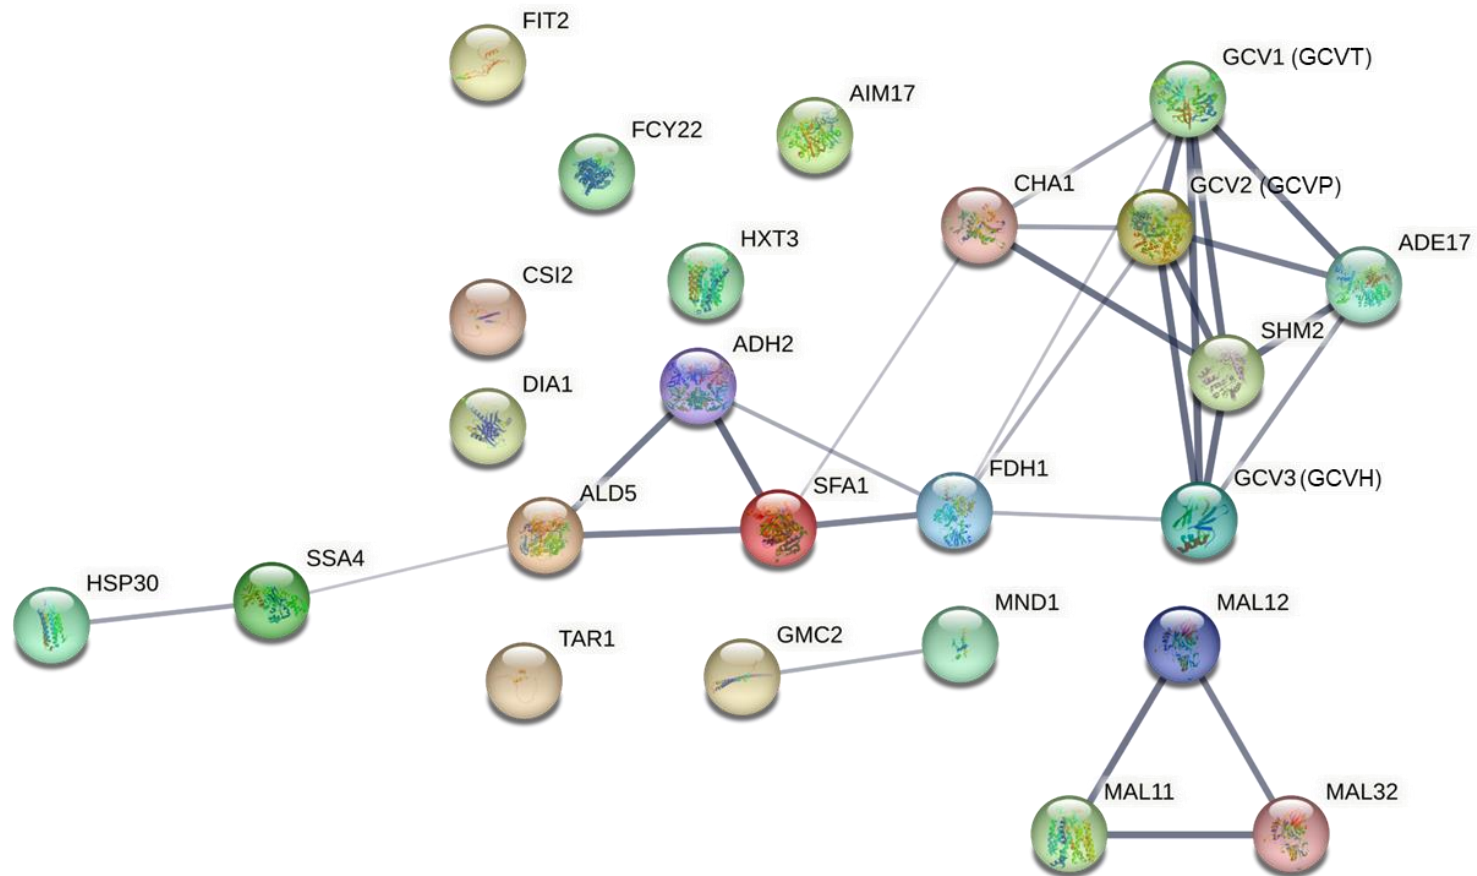

**Fig. S19.** The protein-protein interaction (PPI) network for the 22 differentially expressed genes together with Adh2 and Ald5. The STRING database was used to generate PPIs in DEGs with the STRING tool (Version: 12.0), based on interactions with a medium combined score > 0.4. Line thickness indicates the strength of data support.

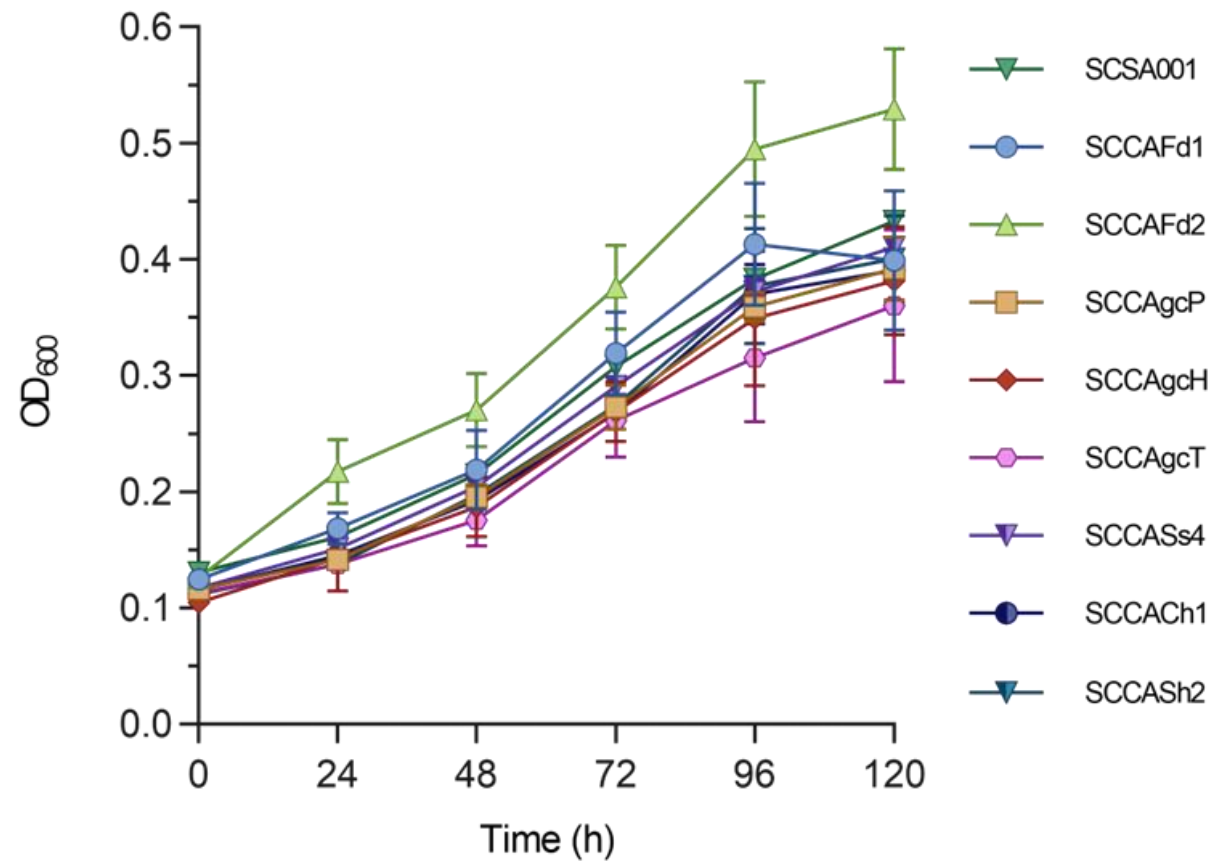

**Fig. S20. Growth curves of strain SCSA001, SCCAFd1, SCCAFd2, SCCAgcP, SCCAgcH, SCCAgcT, SCCASs4, SCCACh1 and SCCASh2 in Delft MM with 2% methanol.** All strains were precultured in YPD medium and washed twice using PBS (pH = 7.2) before cultivated in Delft MM. All data represent the mean  $\pm$  s.d. (n = 3 biologically independent samples).

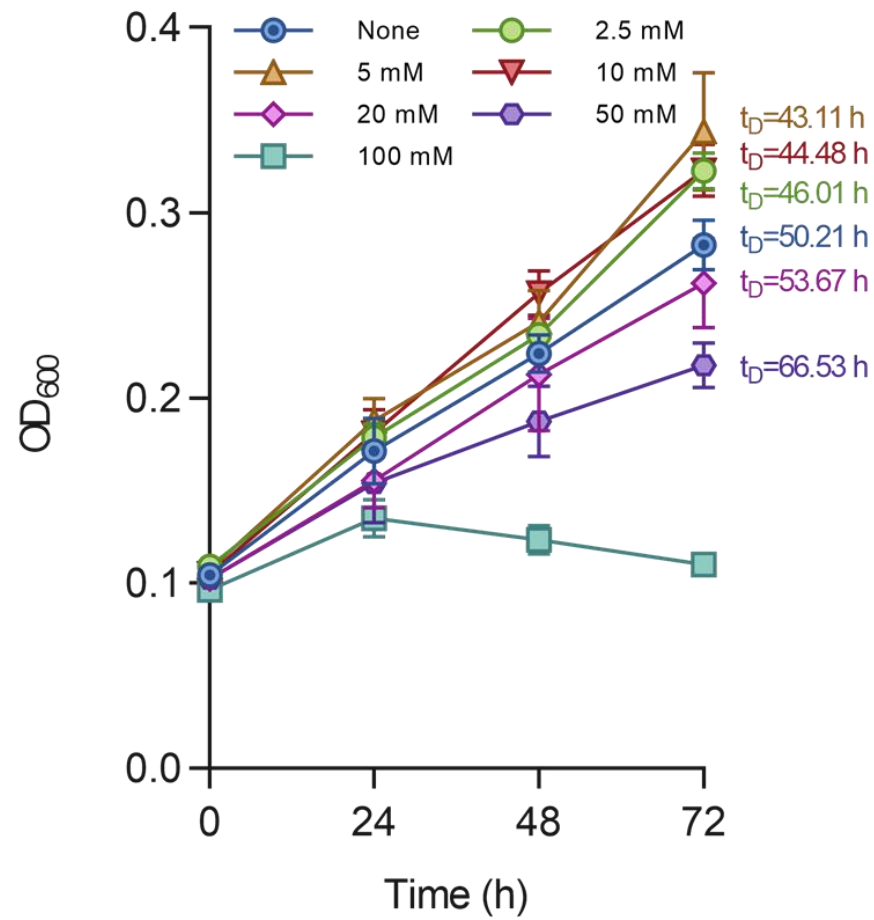

**Fig. S21. Growth curves of strain SCSA001 on Delft MM containing 2% methanol and different concentrations of NaHCO<sub>3</sub>.** All data are presented as mean  $\pm$  s.d. Triplicate independent samples were adopted for each panel.

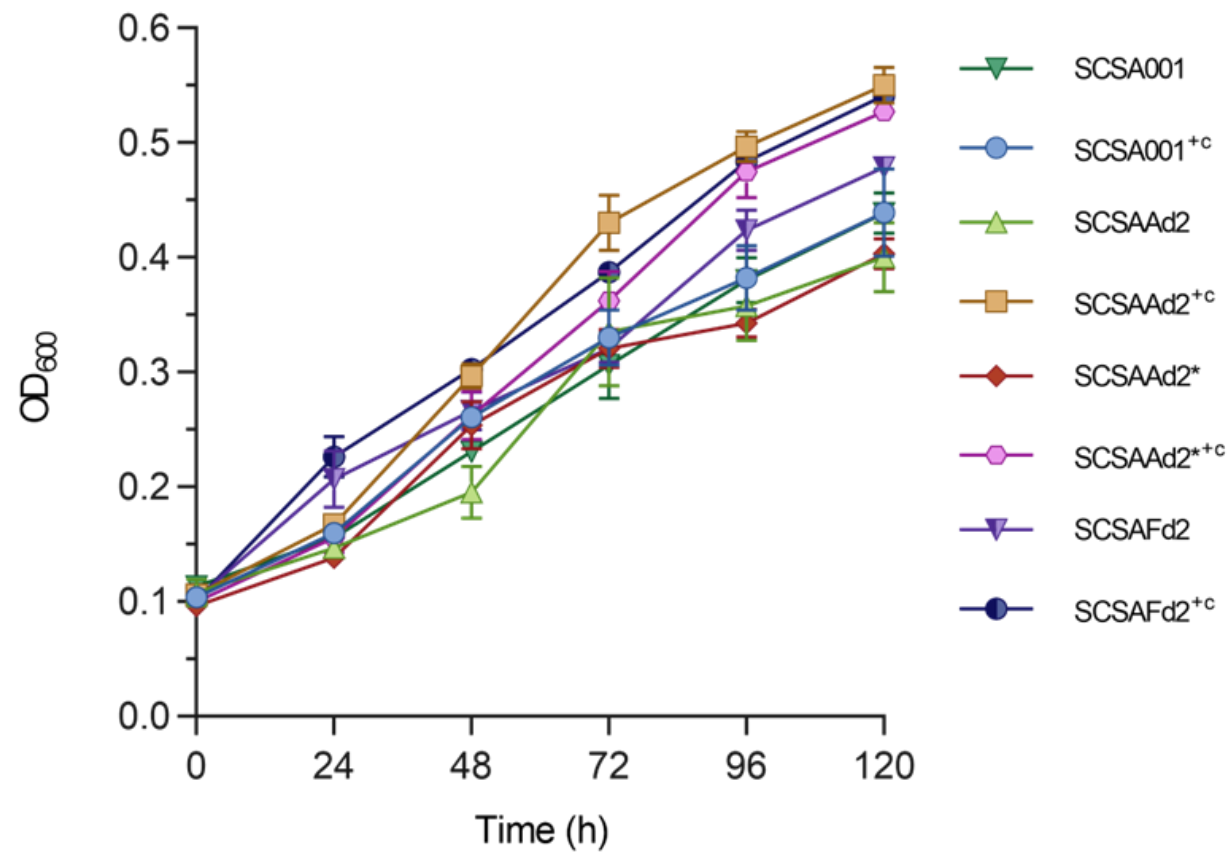

**Fig. S22. Growth curves of strain SCSA001, SCSAAd2, SCSAAd2\* and SCSAFd2 in Delft MM containing 2% methanol with or without C<sub>3</sub>N<sub>4</sub> QDs addition.** All strains were precultured in YPD medium and washed twice using PBS (pH = 7.2) before cultivated in Delft MM. All data represent the mean  $\pm$  s.d. (n = 3 biologically independent samples).

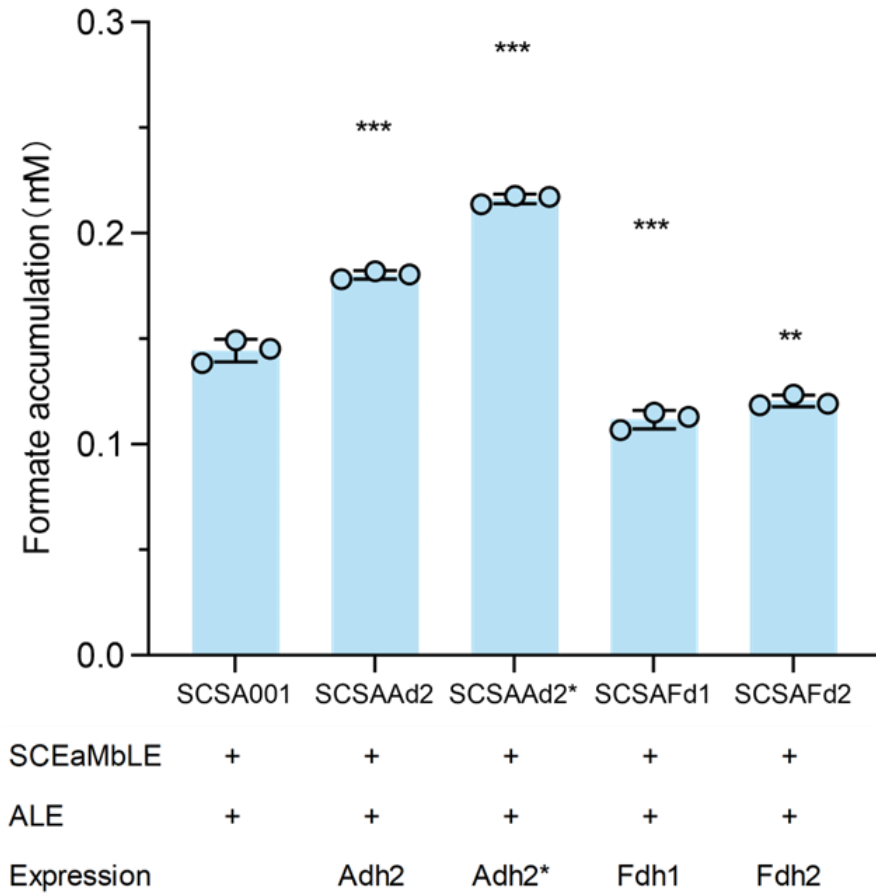

**Fig. S23. Formate accumulation in Delft MM with 2% methanol.** All strains were precultured in YPD medium and washed twice using PBS (pH = 7.2) before cultivated in Delft MM. All data represent the mean  $\pm$  s.d. (n = 3 biologically independent samples). Statistical analysis was performed using a two-tailed Student's t-test (\*\* $P < 0.01$ , \*\*\* $P < 0.001$ ).



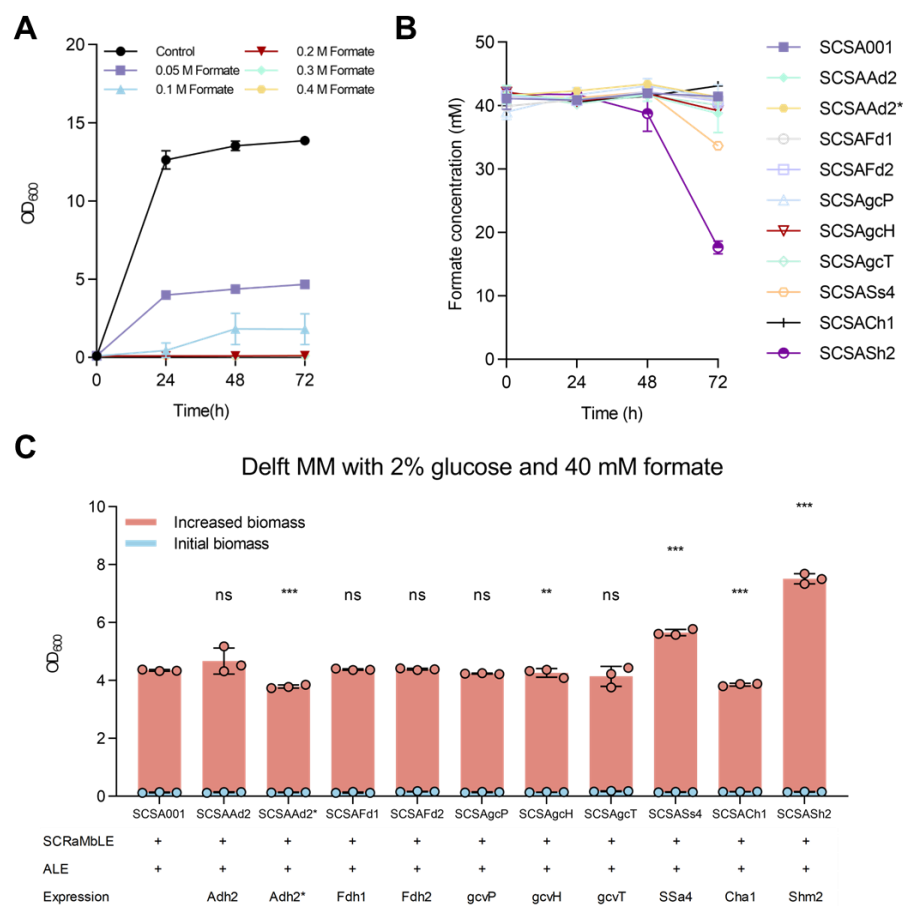

**Fig. S24. Evaluation of the formate detoxification capacity of the ASrG pathway.** (A) Growth curves of strain SCSA001 on Delft MM containing 20 g/L glucose and different concentrations of formate. (B) Formate consumption curve of strains on Delft MM containing 20 g/L glucose and 40 mM formate. (C) Biomass (OD<sub>600</sub>) formation on Delft MM with 2% glucose and 40 mM formate. All strains were precultured in YPD medium and washed twice using PBS (pH = 7.2) before cultivated in Delft MM. All data represent the mean ± s.d. (n = 3 biologically independent samples). Statistical analysis was performed using a two-tailed Student's t-test (\*\**P* < 0.01, \*\*\**P* < 0.001). All data are presented as mean ± s.d. Triplicate independent samples were adopted for each panel.

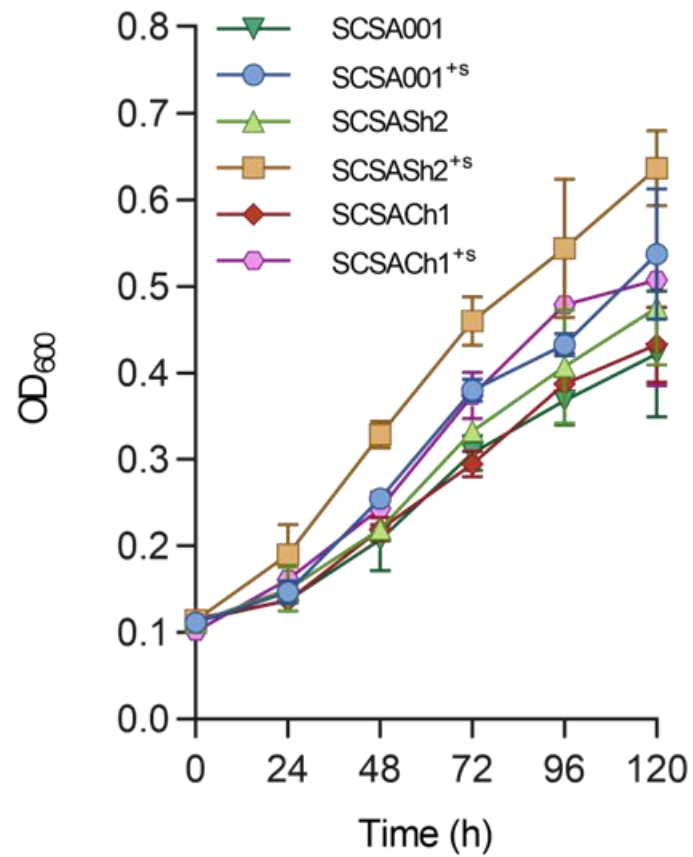

**Fig. S25. Growth curves of strain SCSA001, SCSASH2 and SCSACH1 in Delft MM containing 2% methanol with or without serine addition.** All strains were precultured in YPD medium and washed twice using PBS (pH = 7.2) before cultivated in Delft MM. All data represent the mean  $\pm$  s.d. (n = 3 biologically independent samples).

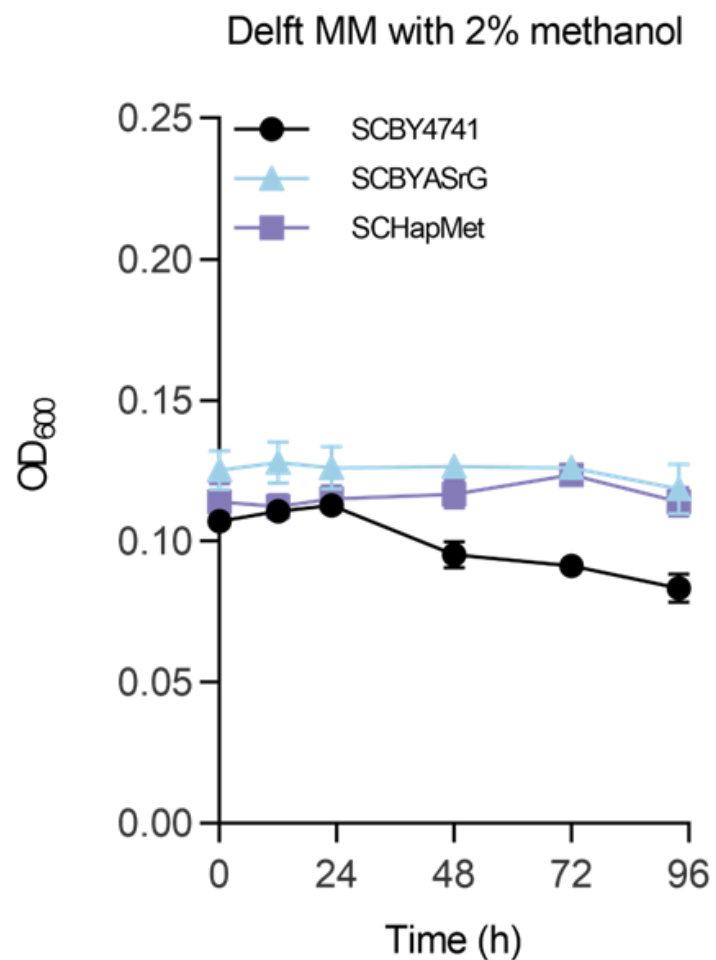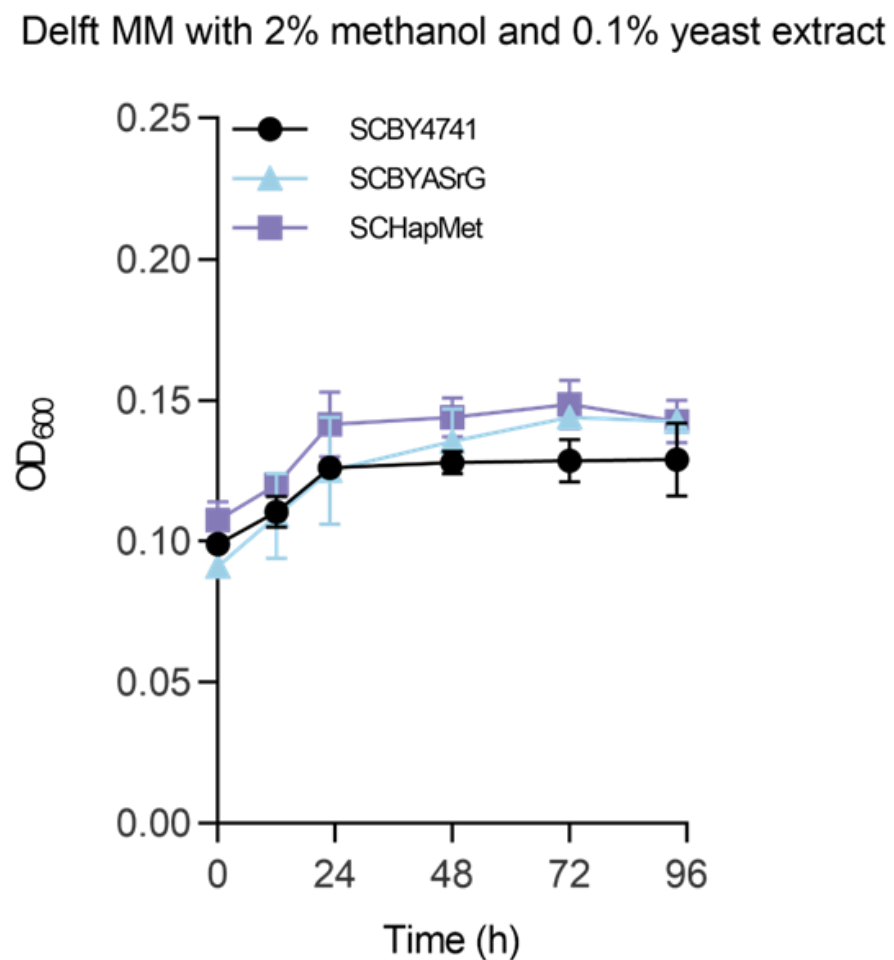

**Fig. S26. Growth curves of *S. cerevisiae* SCBY4741, SCBYASrG, and SCHapMet in Delft MM containing 2% methanol.** For strain SCBY4741 and SCBYASrG, 20 mg/l uracil, 20 mg/l histidine, 100 mg/l leucine, and 20 mg/l methionine were supplemented to compensate for auxotroph; for strain SCHapMet, 20 mg/l uracil was supplemented to compensate for uracil auxotroph. All data are presented as mean  $\pm$  s.d. Triplicate independent samples were adopted for each panel.

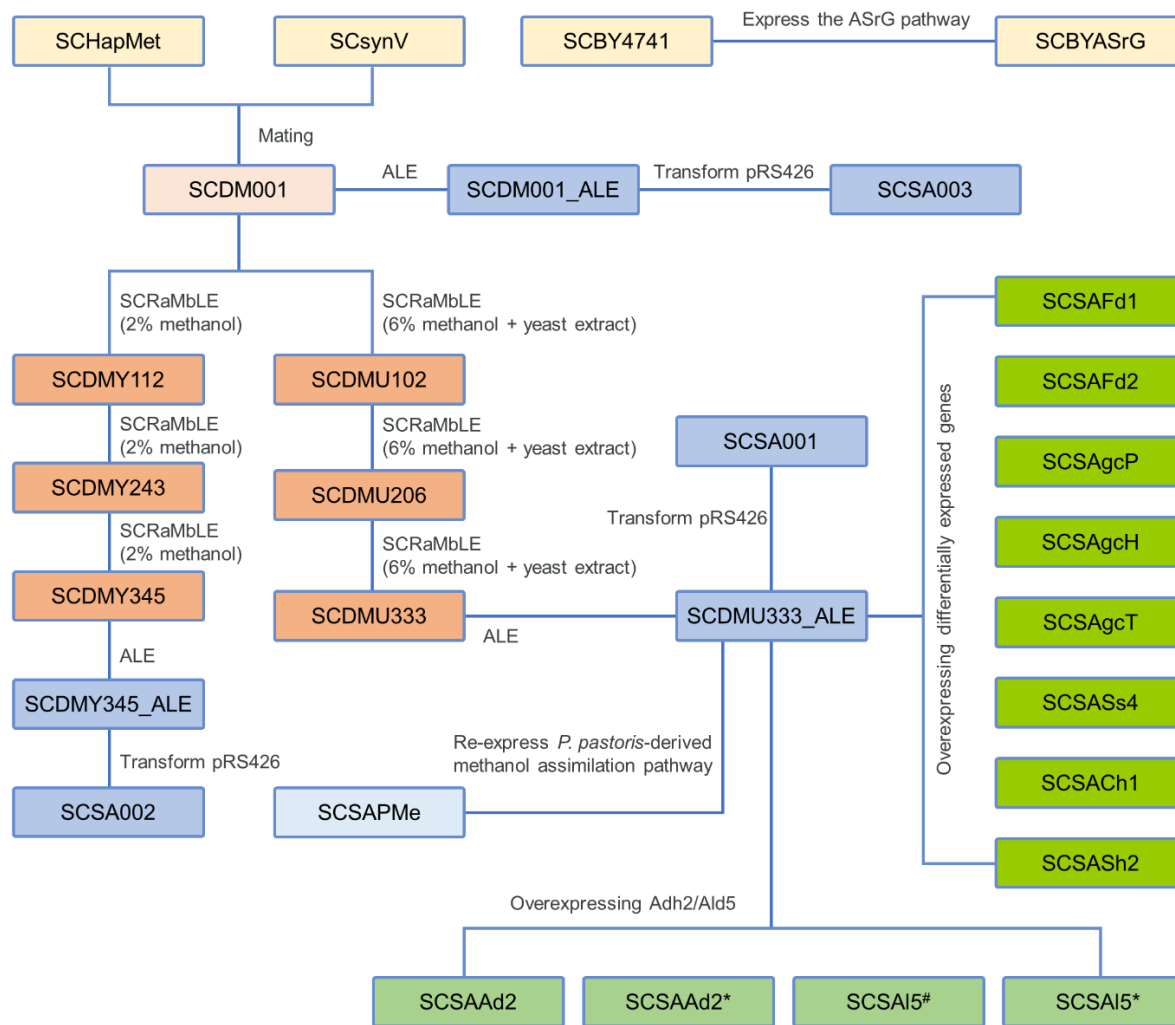

**Fig. S27. Flowchart of *S. cerevisiae* construction in this study.**

## Supplementary Table

**Table S1.** Thermodynamic calculation of the ASrG pathway.

| Steps | Reactions                                                                                                                                                                                                                                 | $\Delta_r G'^m$ (kJ/mol) |
|-------|-------------------------------------------------------------------------------------------------------------------------------------------------------------------------------------------------------------------------------------------|--------------------------|
| 1     | $\text{NAD}^+(\text{aq}) + \text{Methanol}(\text{aq}) \rightleftharpoons \text{NADH}(\text{aq}) + \text{Formaldehyde}(\text{aq})$                                                                                                         | $42.2 \pm 6.5$           |
| 2     | $\text{Formaldehyde}(\text{aq}) + \text{Glutathione}(\text{aq}) \rightleftharpoons \text{S-(Hydroxymethyl)glutathione}(\text{aq})$                                                                                                        | $6.4 \pm 5.6$            |
| 3     | $\text{S-(Hydroxymethyl)glutathione}(\text{aq}) + \text{NAD}^+(\text{aq}) \rightleftharpoons \text{S-Formylglutathione}(\text{aq}) + \text{NADH}(\text{aq})$                                                                              | $-20.6 \pm 9.2$          |
| 4     | $\text{S-Formylglutathione}(\text{aq}) + \text{H}_2\text{O}(\text{l}) \rightleftharpoons \text{Formate}(\text{aq}) + \text{Glutathione}(\text{aq})$                                                                                       | $-16.9 \pm 8.7$          |
| 5     | $\text{ATP}(\text{aq}) + \text{Formate}(\text{aq}) + \text{Tetrahydrofolate}(\text{aq}) \rightleftharpoons \text{ADP}(\text{aq}) + \text{Orthophosphate}(\text{aq}) + \text{10-Formyltetrahydrofolate}(\text{aq})$                        | $-6.7 \pm 3.8$           |
| 6     | $\text{10-Formyltetrahydrofolate}(\text{aq}) \rightleftharpoons \text{H}_2\text{O}(\text{l}) + \text{5,10-Methenyltetrahydrofolate}(\text{aq})$                                                                                           | $1.3 \pm 1.8$            |
| 7     | $\text{NADPH}(\text{aq}) + \text{5,10-Methenyltetrahydrofolate}(\text{aq}) \rightleftharpoons \text{NADP}^+(\text{aq}) + \text{5,10-Methylenetetrahydrofolate}(\text{aq})$                                                                | $13.2 \pm 2.2$           |
| 8     | $\text{Formate}(\text{aq}) + \text{NAD}^+(\text{aq}) \rightleftharpoons \text{CO}_2(\text{aq}) + \text{NADH}(\text{aq})$                                                                                                                  | $-11.7 \pm 6.4$          |
| 9     | $\text{NADH}(\text{aq}) + \text{NH}_3(\text{aq}) + \text{5,10-Methylenetetrahydrofolate}(\text{aq}) + \text{CO}_2(\text{aq}) \rightleftharpoons \text{NAD}^+(\text{aq}) + \text{Glycine}(\text{aq}) + \text{Tetrahydrofolate}(\text{aq})$ | $-8.1 \pm 7.1$           |
| 10    | $\text{5,10-Methylenetetrahydrofolate}(\text{aq}) + \text{Glycine}(\text{aq}) + \text{H}_2\text{O}(\text{l}) \rightleftharpoons \text{Tetrahydrofolate}(\text{aq}) + \text{L-Serine}(\text{aq})$                                          | $6.6 \pm 2.4$            |
| 11    | $\text{L-Serine}(\text{aq}) \rightleftharpoons \text{NH}_3(\text{aq}) + \text{Pyruvate}(\text{aq})$                                                                                                                                       | $-23.6 \pm 1.8$          |
|       | $3 \text{ Methanol} + 2 \text{ H}_2\text{O} + 2 \text{ ATP} + 4 \text{ NAD}^+ \rightleftharpoons \text{Pyruvate} + 2 \text{ ADP} + 4 \text{ NADH}$                                                                                        | $-34.7$                  |
|       | $2 \text{ Methanol} + \text{CO}_2 + \text{H}_2\text{O} + 2 \text{ ATP} + 1 \text{ NAD}^+ \rightleftharpoons \text{Pyruvate} + 2 \text{ ADP} + \text{NADH}$                                                                                | $-7.4$                   |
| Total | $3 \text{ Formate} + 2 \text{ ATP} + 2 \text{ NADH} \rightleftharpoons \text{Pyruvate} + \text{H}_2\text{O} + 2 \text{ ADP} + 2 \text{ NAD}^+$                                                                                            | $-44.6$                  |
|       | $2 \text{ Formate} + \text{CO}_2 + 2 \text{ ATP} + 3 \text{ NADH} \rightleftharpoons \text{Pyruvate} + \text{H}_2\text{O} + 2 \text{ ADP} + 3 \text{ NAD}^+$                                                                              | $-32.9$                  |

The reaction Gibbs energy was calculated through the eQuilibrator biochemical thermodynamics calculator.  $\Delta_r G'^m$  (KJ/mol) is the free Gibbs energy when the reactant concentration was set to be 1 mM under the condition of pH=6.0, pMg=3.0, and 0.1 M ionic strength (78).

**Table S2.** Strains used in this study.

| Strain Name  | Description                                                          | Genotype <sup>s</sup>                                                                                                                                                                                               | Source                      |
|--------------|----------------------------------------------------------------------|---------------------------------------------------------------------------------------------------------------------------------------------------------------------------------------------------------------------|-----------------------------|
| SCBY4741     | /                                                                    | <i>MATa his3Δ1 leu2 met15Δ ura3-52 wtV</i>                                                                                                                                                                          | Invitrogen                  |
| SCHapMet     | haploid, containing <i>P. pastoris</i> methanol assimilation pathway | <i>MATα AOX(P<sub>PGK</sub>)-DAS2(P<sub>TDH</sub>)-CAT(P<sub>PDC</sub>)-DAK(P<sub>FBA</sub>) pdc1(-6,-2)::loxP pdc5(-6,-2)::loxP pdc6(-6,-2)::loxP mutx ura3-52 wtV</i>                                             | Previously constructed (22) |
| SCsynV       | haploid, synV                                                        | <i>MATa, synV</i>                                                                                                                                                                                                   | (10)                        |
| SCDM001      | SCHapMet mating SCsynV                                               | <i>MATa/α AOX(P<sub>PGK</sub>)-DAS2(P<sub>TDH</sub>)-CAT(P<sub>PDC</sub>)-DAK(P<sub>FBA</sub>) pdc1(-6,-2)::loxP pdc5(-6,-2)::loxP pdc6(-6,-2)::loxP mutx ura3-52 synV/wtV</i>                                      | This study                  |
| SCDMU102     | SCDM001, one round SCRaMbLE (2% methanol)                            | <i>MATa/α AOX(P<sub>PGK</sub>)-DAS2(P<sub>TDH</sub>)-CAT(P<sub>PDC</sub>)-DAK(P<sub>FBA</sub>)<sup>&amp;</sup> pdc1(-6,-2)::loxP pdc5(-6,-2)::loxP pdc6(-6,-2)::loxP mutx ura3-52 synV/wtV <b>SCRaMbLE</b></i>      | This study                  |
| SCDMU206     | SCDM001, two rounds SCRaMbLE (2% methanol)                           | <i>MATa/α AOX(P<sub>PGK</sub>)-DAS2(P<sub>TDH</sub>)-CAT(P<sub>PDC</sub>)-DAK(P<sub>FBA</sub>)<sup>&amp;</sup> pdc1(-6,-2)::loxP pdc5(-6,-2)::loxP pdc6(-6,-2)::loxP mutx ura3-52 synV/wtV <b>SCRaMbLE</b></i>      | This study                  |
| SCDMU333     | SCDM001, three rounds SCRaMbLE (2% methanol)                         | <i>MATa/α AOX(P<sub>PGK</sub>)-DAS2(P<sub>TDH</sub>)-CAT(P<sub>PDC</sub>)-DAK(P<sub>FBA</sub>)<sup>&amp;</sup> pdc1(-6,-2)::loxP pdc5(-6,-2)::loxP pdc6(-6,-2)::loxP mutx ura3-52 synV/wtV <b>SCRaMbLE</b></i>      | This study                  |
| SCDMY112     | SCDM001, one round SCRaMbLE (6% methanol + 0.1 g/l yeast extract)    | <i>MATa/α AOX(P<sub>PGK</sub>)-DAS2(P<sub>TDH</sub>)-CAT(P<sub>PDC</sub>)-DAK(P<sub>FBA</sub>)<sup>&amp;</sup> pdc1(-6,-2)::loxP pdc5(-6,-2)::loxP pdc6(-6,-2)::loxP mutx ura3-52 synV/wtV <b>SCRaMbLE</b></i>      | This study                  |
| SCDMY243     | SCDM001, two rounds SCRaMbLE (6% methanol + 0.1 g/l yeast extract)   | <i>MATa/α AOX(P<sub>PGK</sub>)-DAS2(P<sub>TDH</sub>)-CAT(P<sub>PDC</sub>)-DAK(P<sub>FBA</sub>)<sup>&amp;</sup> pdc1(-6,-2)::loxP pdc5(-6,-2)::loxP pdc6(-6,-2)::loxP mutx ura3-52 synV/wtV <b>SCRaMbLE</b></i>      | This study                  |
| SCDMY345     | SCDM001, three rounds SCRaMbLE (6% methanol + 0.1 g/l yeast extract) | <i>MATa/α AOX(P<sub>PGK</sub>)-DAS2(P<sub>TDH</sub>)-CAT(P<sub>PDC</sub>)-DAK(P<sub>FBA</sub>)<sup>&amp;</sup> pdc1(-6,-2)::loxP pdc5(-6,-2)::loxP pdc6(-6,-2)::loxP mutx ura3-52 synV/wtV <b>SCRaMbLE</b></i>      | This study                  |
| SCDM001_ALE  | SCDM001, ALE                                                         | <i>MATa/α pdc1(-6,-2)::loxP pdc5(-6,-2)::loxP pdc6(-6,-2)::loxP mutx ura3-52 synV/wtV <b>ALE</b></i>                                                                                                                | This study                  |
| SCDMU333_ALE | SCDMU333, ALE                                                        | <i>MATa/α pdc1(-6,-2)::loxP pdc5(-6,-2)::loxP pdc6(-6,-2)::loxP mutx ura3-52 synV/wtV <b>SCRaMbLE, ALE</b></i>                                                                                                      | This study                  |
| SCDMY345_ALE | SCDMY345, ALE                                                        | <i>MATa/α AOX(P<sub>PGK</sub>)-DAS2(P<sub>TDH</sub>)-CAT(P<sub>PDC</sub>)-DAK(P<sub>FBA</sub>)<sup>&amp;</sup> pdc1(-6,-2)::loxP pdc5(-6,-2)::loxP pdc6(-6,-2)::loxP mutx ura3-52 synV/wtV <b>SCRaMbLE, ALE</b></i> | This study                  |
| SCSA001      | SCDMU333_ALE, pRS426                                                 | <i>MATa/α pdc1(-6,-2)::loxP pdc5(-6,-2)::loxP pdc6(-6,-2)::loxP mutx synV/wtV <b>SCRaMbLE, ALE</b></i>                                                                                                              | This study                  |
| SCSA002      | SCDMY345_ALE, pRS426                                                 | <i>MATa/α AOX(P<sub>PGK</sub>)-DAS2(P<sub>TDH</sub>)-CAT(P<sub>PDC</sub>)-DAK(P<sub>FBA</sub>)<sup>&amp;</sup> pdc1(-6,-2)::loxP pdc5(-6,-2)::loxP pdc6(-6,-2)::loxP mutx synV/wtV <b>SCRaMbLE, ALE</b></i>         | This study                  |
| SCSA003      | SCDM001_ALE, pRS426                                                  | <i>MATa/α pdc1(-6,-2)::loxP pdc5(-6,-2)::loxP pdc6(-6,-2)::loxP mutx synV/wtV</i>                                                                                                                                   | This study                  |

|                      |                                                                                   | <b>ALE</b>                                                                                                                                                                                                                                                                                                                                                          |            |
|----------------------|-----------------------------------------------------------------------------------|---------------------------------------------------------------------------------------------------------------------------------------------------------------------------------------------------------------------------------------------------------------------------------------------------------------------------------------------------------------------|------------|
| SCSAPMe              | SCSA001, overexpressing <i>P. pastoris</i> -derived methanol assimilation pathway | <i>MATa/α pdc1(-6,-2)::loxP pdc5(-6,-2)::loxP pdc6(-6,-2)::loxP mutx synV/wtV</i><br><b>SCRaMbLE, ALE</b> , pRS426 (P <sub>PGK1</sub> - <i>PpAox1</i> (ePTS)-T <sub>CYC1</sub> -P <sub>TDH3</sub> - <i>PpDas2</i> (ePTS)-T <sub>PGK1</sub> -P <sub>PDCC1</sub> - <i>PpCta</i> (ePTS)-T <sub>TDH2</sub> -P <sub>FBA1</sub> - <i>PpDak</i> (ePTS)-T <sub>ENO2</sub> ) | This study |
| SCSAAAd2             | SCSA001, overexpressing Adh2                                                      | <i>MATa/α pdc1(-6,-2)::loxP pdc5(-6,-2)::loxP pdc6(-6,-2)::loxP mutx synV/wtV</i><br><b>SCRaMbLE, ALE</b> , pRS426 (P <sub>TEF1</sub> -Adh2-T <sub>ENO2</sub> )                                                                                                                                                                                                     | This study |
| SCSAAAd2*            | SCSA001, overexpressing Adh2*                                                     | <i>MATa/α pdc1(-6,-2)::loxP pdc5(-6,-2)::loxP pdc6(-6,-2)::loxP mutx synV/wtV</i><br><b>SCRaMbLE, ALE</b> , pRS426 (P <sub>TEF1</sub> -Adh2*-T <sub>ENO2</sub> )                                                                                                                                                                                                    | This study |
| SCSAAI5 <sup>#</sup> | SCSA001, overexpressing Ald5 <sup>#</sup>                                         | <i>MATa/α pdc1(-6,-2)::loxP pdc5(-6,-2)::loxP pdc6(-6,-2)::loxP mutx synV/wtV</i><br><b>SCRaMbLE, ALE</b> , pRS426 (P <sub>TEF1</sub> -Ald5 <sup>#</sup> -T <sub>ENO2</sub> )                                                                                                                                                                                       | This study |
| SCSAAI5*             | SCSA001, overexpressing Ald5*                                                     | <i>MATa/α pdc1(-6,-2)::loxP pdc5(-6,-2)::loxP pdc6(-6,-2)::loxP mutx synV/wtV</i><br><b>SCRaMbLE, ALE</b> , pRS426 (P <sub>TEF1</sub> -Ald5*-T <sub>ENO2</sub> )                                                                                                                                                                                                    | This study |
| SCSAFd1              | SCSA001, overexpressing Fdh1                                                      | <i>MATa/α pdc1(-6,-2)::loxP pdc5(-6,-2)::loxP pdc6(-6,-2)::loxP mutx synV/wtV</i><br><b>SCRaMbLE, ALE</b> , pRS426 (P <sub>TEF1</sub> -Fdh1-T <sub>ENO2</sub> )                                                                                                                                                                                                     | This study |
| SCSAFd2              | SCSA001, overexpressing Fdh2                                                      | <i>MATa/α pdc1(-6,-2)::loxP pdc5(-6,-2)::loxP pdc6(-6,-2)::loxP mutx synV/wtV</i><br><b>SCRaMbLE, ALE</b> , pRS426 (P <sub>TEF1</sub> -Fdh2-T <sub>ENO2</sub> )                                                                                                                                                                                                     | This study |
| SCSAgcP              | SCSA001, overexpressing gcvP                                                      | <i>MATa/α pdc1(-6,-2)::loxP pdc5(-6,-2)::loxP pdc6(-6,-2)::loxP mutx synV/wtV</i><br><b>SCRaMbLE, ALE</b> , pRS426 (P <sub>TEF1</sub> -gcvP-T <sub>ENO2</sub> )                                                                                                                                                                                                     | This study |
| SCSAgcH              | SCSA001, overexpressing gcvH                                                      | <i>MATa/α pdc1(-6,-2)::loxP pdc5(-6,-2)::loxP pdc6(-6,-2)::loxP mutx synV/wtV</i><br><b>SCRaMbLE, ALE</b> , pRS426 (P <sub>TEF1</sub> -gcvH-T <sub>ENO2</sub> )                                                                                                                                                                                                     | This study |
| SCSAgcT              | SCSA001, overexpressing gcvT                                                      | <i>MATa/α pdc1(-6,-2)::loxP pdc5(-6,-2)::loxP pdc6(-6,-2)::loxP mutx synV/wtV</i><br><b>SCRaMbLE, ALE</b> , pRS426 (P <sub>TEF1</sub> -gcvT-T <sub>ENO2</sub> )                                                                                                                                                                                                     | This study |
| SCSASs4              | SCSA001, overexpressing Ssa4                                                      | <i>MATa/α pdc1(-6,-2)::loxP pdc5(-6,-2)::loxP pdc6(-6,-2)::loxP mutx synV/wtV</i><br><b>SCRaMbLE, ALE</b> , pRS426 (P <sub>TEF1</sub> -Ssa4-T <sub>ENO2</sub> )                                                                                                                                                                                                     | This study |
| SCSACH1              | SCSA001, overexpressing Cha1                                                      | <i>MATa/α pdc1(-6,-2)::loxP pdc5(-6,-2)::loxP pdc6(-6,-2)::loxP mutx synV/wtV</i><br><b>SCRaMbLE, ALE</b> , pRS426 (P <sub>TEF1</sub> -Cha1-T <sub>ENO2</sub> )                                                                                                                                                                                                     | This study |
| SCSASH2              | SCSA001, overexpressing Shm2                                                      | <i>MATa/α pdc1(-6,-2)::loxP pdc5(-6,-2)::loxP pdc6(-6,-2)::loxP mutx synV/wtV</i><br><b>SCRaMbLE, ALE</b> , pRS426 (P <sub>TEF1</sub> -Shm2-T <sub>ENO2</sub> )                                                                                                                                                                                                     | This study |
| SCBYASrG             | SCBY4741, overexpressing the ASrG pathway                                         | <i>MATa Adh2*(P<sub>TEF1</sub>)-Fdh2(P<sub>PGK1</sub>)-GcvP(P<sub>TDH</sub>)-GcvH(P<sub>PDCC</sub>)-GcvT(P<sub>FBA</sub>) his3Δ1 leu2 met15Δ ura3-52 wtV</i>                                                                                                                                                                                                        | This study |
| PPGS115              | <i>Komagataella phaffii</i> GS115                                                 | <i>Mut<sup>+</sup>, his4<sup>-</sup>, Aox1, Aox2</i>                                                                                                                                                                                                                                                                                                                | This study |
| PPAdh2               | PPGS115, overexpressing Adh2                                                      | <i>Mut<sup>+</sup>, his4<sup>-</sup>, Aox1, Aox2, AOX1::P<sub>GAP</sub>-Adh2-T<sub>Aox1</sub></i>                                                                                                                                                                                                                                                                   | This study |

---

|         |                               |                                                                                                                     |            |
|---------|-------------------------------|---------------------------------------------------------------------------------------------------------------------|------------|
| PPAdh2* | PPGS115, overexpressing Adh2* | <i>Mut</i> <sup>+</sup> , <i>his4</i> , <i>Aox1</i> , <i>Aox2</i> , AOX1::P <sub>GAP</sub> -Adh2*-T <sub>Aox1</sub> | This study |
|---------|-------------------------------|---------------------------------------------------------------------------------------------------------------------|------------|

---

<sup>§</sup> The genotype changes caused by SCRaMble and ALE cannot be fully described in this table. Detailed genotypic changes were shown in **Supplementary Data**.

<sup>&</sup> It is uncertain whether the *P. pastoris* methanol assimilation pathway is present in the genomes of these strains as whole genome sequencing was not performed on these strains.



**Table S3.** Plasmids used in this study.

| Plasmid name             | Genotype                                                                                                                                                                                                                                             | Source     |
|--------------------------|------------------------------------------------------------------------------------------------------------------------------------------------------------------------------------------------------------------------------------------------------|------------|
| pLM050-pCLB2-CreEBD      | pRS413, pCLB2-Cre-EBD-tCYC1, CEN/ARS with <i>His3</i> marker                                                                                                                                                                                         | (17)       |
| pLM050-pCLB2-CreEBD-Hph  | pRS413, pCLB2-Cre-EBD-tCYC1, CEN/ARS with <i>His3</i> and hygromycin marker                                                                                                                                                                          | This study |
| pRS426                   | <i>Ura3</i> marker                                                                                                                                                                                                                                   | Invitrogen |
| pRS426-Adh2              | pRS426, P <sub>TEF1</sub> -Adh2-T <sub>ENO2</sub>                                                                                                                                                                                                    | This study |
| pRS426-Adh2*             | pRS426, P <sub>TEF1</sub> -Adh2*-T <sub>ENO2</sub>                                                                                                                                                                                                   | This study |
| pRS426-Ald5 <sup>#</sup> | pRS426, P <sub>TEF1</sub> -Ald5 <sup>#</sup> -T <sub>ENO2</sub>                                                                                                                                                                                      | This study |
| pRS426-Ald5*             | pRS426, P <sub>TEF1</sub> -Ald5*-T <sub>ENO2</sub>                                                                                                                                                                                                   | This study |
| pRS426-Fdh1              | pRS426, P <sub>TEF1</sub> -Fdh1-T <sub>ENO2</sub>                                                                                                                                                                                                    | This study |
| pRS426-Fdh2              | pRS426, P <sub>TEF1</sub> -Fdh2-T <sub>ENO2</sub>                                                                                                                                                                                                    | This study |
| pRS426-gcvP              | pRS426, P <sub>TEF1</sub> -gcvP-T <sub>ENO2</sub>                                                                                                                                                                                                    | This study |
| pRS426-gcvH              | pRS426, P <sub>TEF1</sub> -gcvH-T <sub>ENO2</sub>                                                                                                                                                                                                    | This study |
| pRS426-gcvT              | pRS426, P <sub>TEF1</sub> -gcvT-T <sub>ENO2</sub>                                                                                                                                                                                                    | This study |
| pRS426-Ssa4              | pRS426, P <sub>TEF1</sub> -Ssa4-T <sub>ENO2</sub>                                                                                                                                                                                                    | This study |
| pRS426-Cha1              | pRS426, P <sub>TEF1</sub> -Cha1-T <sub>ENO2</sub>                                                                                                                                                                                                    | This study |
| pRS426-Shm2              | pRS426, P <sub>TEF1</sub> -Shm2-T <sub>ENO2</sub>                                                                                                                                                                                                    | This study |
| pRS426-PpMet             | pRS426, P <sub>PGK1</sub> - <i>PpAox1</i> (ePTS)-T <sub>CYC1</sub> -P <sub>TDH3</sub> - <i>PpDas2</i> (ePTS)-T <sub>PGK1</sub> -P <sub>PDC1</sub> - <i>PpCta</i> (ePTS)-T <sub>TDH2</sub> -P <sub>FBA1</sub> - <i>PpDak</i> (ePTS)-T <sub>ENO2</sub> | This study |
| pGAPZ(alpha) B           | Zeocin marker, alpha-Factor                                                                                                                                                                                                                          | Invitrogen |
| pGAPZ(alpha) B-Adh2      | pGAPZ(alpha) B, P <sub>GAP</sub> -Adh2-T <sub>Aox1</sub>                                                                                                                                                                                             | This study |
| pGAPZ(alpha) B-Adh2*     | pGAPZ(alpha) B, P <sub>GAP</sub> -Adh2*-T <sub>Aox1</sub>                                                                                                                                                                                            | This study |

**Table S4.** Primers used in this study.

| <b>Primer name</b> | <b>Sequence (5'-3')</b>                           |
|--------------------|---------------------------------------------------|
| TEF-HPH F          | AATGTTTCTACTCCTTTTTTACTCTTC                       |
| HPH-CYC1tt R       | GCAAATTAAGCCTTCGAGC                               |
| EcoR1-pTEF F       | GATAAGCTTGATATCGAATCAATGTTTCTACTCCTTTTTTACTCTTCCA |
| CYC1tt -EcoR1 R    | ATTGGCGGGCTGCAGGAATTCGCAAATTAAGCCTTCGAGCG         |
| Cre-hph cof F      | CTGATCGAAAAGTTCGACAGCG                            |
| Cre-hph cof R      | TCTGACAAACGAGCGAATGAAG                            |
| YEL056W1 F         | CTCACACCACAGTAGCAATTTGTTGGCT                      |
| YEL056W1 R         | GCCACCAACAATTGGCAATGAGTGA CTG                     |
| YEL038W1 F         | TCCAGCTCACGACAGCTTAGACTTAAAC                      |
| YEL038W1 R         | AACTGGAGCGTTGCCTGGTCTACTG                         |
| YEL022W3 F         | GACCATTGGCTTATTGTTGTGTACCCA                       |
| YEL022W3 R         | ATTACCATGATGCTCTTCTGGCATGACG                      |
| YER026C1 F         | TGATTTGCTGATCATACCGCAACCGTGA                      |
| YER026C1 R         | CGGCAAGCCACACTATGTTTCAGAGAGCT                     |
| YER043C1 F         | GCAGCCGGCGATTCTAGCACCTTTAAT                       |
| YER043C1 R         | TGGTTGCCGTGAAAGTTTGGTTGATGGC                      |
| YER056C2 F         | AAAAGCCAAGCCGGCGACCAA ACTAAAG                     |
| YER056C2 R         | CGCTTATGAGAAGTGGAGCTGGGTCCA                       |
| YER070W2 F         | GCGTCCAGGCGCTTTCGCTTTGTATTTA                      |
| YER070W2 R         | CTTCTCATATCTAGTG TACAAGGCCTCG                     |

---

|            |                               |
|------------|-------------------------------|
| YER086W1 F | TAGCCAAGGCGTTGGCTTAAGCAGTAGA  |
| YER086W1 R | CAAAACAACCTTGGCTACCCAAACGGCTA |
| YER100W1 F | CCCAGGTTGGAGCGTTAGCACTATCTTA  |
| YER100W1 R | AGCTTGTTCTGGCTCTGATACGATCTTCT |
| YER113C2 F | ACCAACGCTGTTAGCCAATGACATCCAG  |
| YER113C2 R | CCACTGCCCAGGTGCTAGCAAAAATTAT  |
| YER144C2 F | AGTGCTTGGGGTGTCAACTTGCTCAAG   |
| YER144C2 R | CAGCGTTATCAAGCCATTATCAGGTACC  |
| YER149C1 F | ACTGCTTCTAGCACGCTTGCTGTTAGGA  |
| YER149C1 R | TTTGTGAGTCAAAACCCAAGCCACCCA   |
| YER172C6 F | GCTACCTTCTGGCAAACCTTGGTA      |
| YER172C6 R | GTTGAGAAGCGAGTTGGGCTATAAAGAC  |
| YER188W1 F | TCGTAGAAGCGACGCTTTGGGTGTTACC  |
| YER188W1 R | GTTCCAACACAACATCTGACCAGGTCTG  |
| MATa F     | ACTCCACTTCAAGTAAGAGTTTG       |
| MATa/α R   | AGTCACATCAAGATCGTTTATGG       |
| MATα F     | GCACGGAATATGGGACTACTTCG       |
| AOX1 cof F | ATGGCTATCCCCGAAGAGTTTG        |
| AOX1 cof R | TTAGAATCTAGCAAGACCGGTCTTC     |
| DAS1 cof F | ATGGCTAGAATTCCAAAAGCAGTAT     |
| DAS1 cof R | TTACAACCTTGTCATGCTTTGGTTTT    |
| CTA cof F  | ATGTCTCAACCACCTAAATGGACA      |

---

---

|                |                                                             |
|----------------|-------------------------------------------------------------|
| CTA cof R      | CTACAATCTTGCTGCAGAGTCACC                                    |
| DAK cof F      | ATGTCTAGTAAACATTGGGATTACAAGAA                               |
| DAK cof R      | CTACAACCTGGTTTCAGATTTGAAGTATG                               |
| NS1            | GTAGTCATATGCTTGTCTC                                         |
| NS8            | TCCG-CAGGTTACCTACGGA                                        |
| Sac1-TEF1p F   | GCCGCCACCGCGGTGGAGCTGATCCCCACACACCATAGCT                    |
| TEF1p-ENO2tt R | CTTAGTTAAAAGCACTGAGCTCTTGTAATTAACCTTAGATTAGATTGCTATGC       |
| TEF1p-ENO2tt F | ACAAGAGCTCAGTGCTTTTAACTAAGAATTATTAGTCTTTTC                  |
| ENO2tt-Sac1 R  | AGGGAACAAAAGCTGGAGCTAGGTATCATCTCCATCTCCCATATG               |
| Sac1-PAC F     | GCCGCCACCGCGGTGGAGCTCTATTTTAGATTCTGACTTCAACTCAAGA           |
| PAC-TDP R      | GCAAATTAAGCCTTCGAGCG                                        |
| PAC-TDP F      | GCTCGAAGGCTTTAATTTGCATAAAAAACACGCTTTTTTCAGTTCG              |
| TDP-PCT R      | CTTAGGTTAACGAACGCAGAATTTTC                                  |
| TDP-PCT F      | CTGCGTTCGTAAACCTAAGTAACCTATTCAAAGTAATATCTCATACATG           |
| PCT-FDE R      | GCGAAAAGCCAATTAGTGTGATAC                                    |
| PCT-FDE F      | CACACTAATTGGCTTTTCGCATAACAATACTGACAGTACTAAATAATTGCC         |
| FDE-Sac1 R     | AGGGAACAAAAGCTGGAGCTCAGGTATCATCTCCATCTCCCATATG              |
| Aox1-ePTS F    | CTTACGAGAAGACCGGTCTTGCTAGATTCTTGGGAAGAGGTAGAAGATCTAAGTTGTAA |
| Aox1-ePTS R    | TAAGCGTGACATAACTAATTACATGATTACAACCTTAGATCTTCTACCTCTTCCCAA   |
| Das2-ePTS F    | AGGGAACAAAGCATGACAAGTTGTTGGGAAGAGGTAGAAGATCTAAGTTGTAA       |
| Das2-ePTS R    | TCTATCGATTTCAATTCAATTCAATTTTTACAACCTTAGATCTTCTACCTCTTCCCAA  |
| Cta-ePTS F     | CCAAGAGGTGACTCTGCAGCAAGATTGTTGGGAAGAGGTAGAAGATCTAAGTTGTAG   |

---

---

|                           |                                                               |
|---------------------------|---------------------------------------------------------------|
| Cta-ePTS R                | AAATCATTAAAGTAACTTAAGGAGTTAAATCTACAACCTTAGATCTTCTACCTCTTCCCAA |
| Dak-ePTS F                | GCATACTTCAAATCTGAAACCAAGTTGTTGGGAAGAGGTAGAAGATCTAAGTTGTAG     |
| Dak-ePTS R                | AAAGACTAATAATTCTTAGTTAAAAGCACTCTACAACCTTAGATCTTCTACCTCTTCCCAA |
| Sac1-ADH2                 | AAGTTTTAATTACAAGAGCTCATGTCTATTCCAGAACTCAAAAAGC                |
| ADH2-Sac1 R               | TTAGTTAAAAGCACTGAGCTCTTATTTAGAAGTGTCAACAACGTATCTACC           |
| Sac1-ALD5 F               | AAGTTTTAATTACAAGAGCTCATGCTTTCTCGCACAAGAGCTG                   |
| ALD5 <sup>#</sup> -Sac1 R | TTAGTTAAAAGCACTGAGCTCTCAACGAATTGGCTTGCAATG                    |
| ALD5*-Sac1 R              | TTAGTTAAAAGCACTGAGCTCCTACACCAGCGGGTATGCCT                     |
| Sac1-CHA1 F               | AAGTTTTAATTACAAGAGCTCATGTCTGATAGTCTACAATAAAACACCATT           |
| CHA1-Sac1 R               | TTAGTTAAAAGCACTGAGCTCTCAAGCACTTTTTTAAATTCACAATATTT            |
| Sac1-FDH1 F               | AAGTTTTAATTACAAGAGCTCATGTCTGAAGGGAAAGTTTTGC                   |
| FDH1-Sac1 R               | TTAGTTAAAAGCACTGAGCTCTTATTTCTTCTGTCCATAAGCTCTGG               |
| Sac1-FDH2 F               | AAGTTTTAATTACAAGAGCTCATGTCTGAAGGGAAAGTTTTGC                   |
| FDH2-Sac1 R               | TTAGTTAAAAGCACTGAGCTCTTATTTCTTCTGTCCATAAGCTCTGG               |
| Sac1-gevH F               | AAGTTTTAATTACAAGAGCTCATGTTACGCACTACTAGACTATGGACC              |
| gevH-Sac1 R               | TTAGTTAAAAGCACTGAGCTCTCAGTCATCATGAACCAGTGTCTTT                |
| Sac1-gevP F               | AAGTTTTAATTACAAGAGCTCATGCTTAGGACAAGAGTACTGCTC                 |
| gevP-Sac1 R               | TTAGTTAAAAGCACTGAGCTCTCATTAGTTTCGTTTCGCAATT                   |
| Sac1-gevT F               | AAGTTTTAATTACAAGAGCTCATGTCTATAATCAAAAAAATTGTGTTAAGA           |
| gevT-Sac1 R               | TTAGTTAAAAGCACTGAGCTCTTACTGCTTGTAAGTAATGTGTGGGC               |
| Sac1-HSP F                | AAGTTTTAATTACAAGAGCTCATGTCAAAAGCTGTTGGTATTGATTT               |
| HSP-Sac1 R                | TTAGTTAAAAGCACTGAGCTCCTAATCAACCTCTTCAACCGTTGG                 |

---

---

|                |                                                      |
|----------------|------------------------------------------------------|
| Sac1-SHMT F    | AAGTTTTAATTACAAGAGCTCATGCCTTACACTCTATCCGACGC         |
| SHMT-Sac1 R    | TTAGTTAAAAGCACTGAGCTCTTACACAGCCAATGGGTATTCG          |
| prs426 cof F   | CATTGATATTTAAGTTAATAAACGGTCTTC                       |
| prs426 cof R   | TATTCGTTAATATAAAGTGTTCTAAACTATGATG                   |
| EcoR1-Adh2 F   | AGGCTGAAGCTGCAGGAATTCATGTCTATTCCAGAACTCAAAAAGC       |
| Adh2-EcoR1 R   | CCGGCTGGGCCACGTGAATTCTTATTTAGAAGTGTCAACAACGTATCTACC  |
| Delta1-KanMX F | TGTTGGAATAAAAATCAACTATCGGCTGGCAACTAATAGGGACACTACCA   |
| Delta1-KanMX F | ATAGGCCACTAGTGGATCTGATATCA                           |
| Adh2* F        | CAGATCCACTAGTGGCCTATTTGTAATTA-AACTTAGATTAGATTGCTATGC |
| Adh2* R        | GGTATACTGGAGGCTTCATGAGTTATG                          |
| Fdh2 F         | CATGAAGCCTCCAGTATACCTATTTTAGATTCCCTGACTTCAACTCAAGA   |
| Fdh2 R         | GCAAATTAAGCCTTCGAGCG                                 |
| GcvP F         | GCTCGAAGGCTTTAATTTGCATAAAAACACGCTTTTTTCAGTTCG        |
| GcvP R         | CTTAGGTTAACGAACGCAGAATTTTC                           |
| GcvH F         | CTGCGTTCGTAAACCTAAGTAACCTATTCAAAGTAATATCTCATACATG    |
| GcvH R         | GCGAAAAGCCAATTAGTGTGATAC                             |
| GcvT F         | CACACTAATTGGCTTTTCGCATAACAATACTGACAGTACTAAATAATTGCC  |
| GcvT R         | AAAAAAAAGTTCCGAGTAATTAATGTTGAGATATGTTGGAATAAAAATCAAC |

---

**Table S5.** Sequences of mutant genes used in this study.

| Gene  | Sequence                                                                                                                                                                                                                                                                                                                                                                                                                                                                                                                                                                                                                                                                                                                                                                                                                                                                                                                                                                                                                                                                                                                                                                                                                                                                                                                                                                                                                                                                                                                                                                                                                                                                                                                                                                                                                                                                                                                                                                                                                                                                                                                                                                                                                                                                                                                                                                                                                                                                                                                                                                                                                                                                                                                                                                                                                                                                                                                                                                                                                                                                                                                                                                                                                                                                                                                                                         |
|-------|------------------------------------------------------------------------------------------------------------------------------------------------------------------------------------------------------------------------------------------------------------------------------------------------------------------------------------------------------------------------------------------------------------------------------------------------------------------------------------------------------------------------------------------------------------------------------------------------------------------------------------------------------------------------------------------------------------------------------------------------------------------------------------------------------------------------------------------------------------------------------------------------------------------------------------------------------------------------------------------------------------------------------------------------------------------------------------------------------------------------------------------------------------------------------------------------------------------------------------------------------------------------------------------------------------------------------------------------------------------------------------------------------------------------------------------------------------------------------------------------------------------------------------------------------------------------------------------------------------------------------------------------------------------------------------------------------------------------------------------------------------------------------------------------------------------------------------------------------------------------------------------------------------------------------------------------------------------------------------------------------------------------------------------------------------------------------------------------------------------------------------------------------------------------------------------------------------------------------------------------------------------------------------------------------------------------------------------------------------------------------------------------------------------------------------------------------------------------------------------------------------------------------------------------------------------------------------------------------------------------------------------------------------------------------------------------------------------------------------------------------------------------------------------------------------------------------------------------------------------------------------------------------------------------------------------------------------------------------------------------------------------------------------------------------------------------------------------------------------------------------------------------------------------------------------------------------------------------------------------------------------------------------------------------------------------------------------------------------------------|
| Adh2* | <p>ATGTCATTCCAGAACTCAAAAAGCCATTATCTTCTACGAATCCAACGGCAAGTTGGAGCATAAGGATATCCCAGTTCCAAAGCCAAAG<br/>           CCCAACGAATTGTTAATCAACGTCAAATACTCTGGTGTCTGCCACACCGATTTGCACGCTTGGCATGGTACTGGCCATTGCCAACTAAG<br/>           TTACCATTAGTTGGTGGGCACGAAGGTGCTGGGGTCGTTGTTGCTATCGGGGACAACGTTAGGGGTTGGAAAGTGGGTGATCTTGCCGG<br/>           TATTAATGGTTGAACAGTTCATGTATGGCCTGCGAATACTGTGAATTGGGTAACGAATCCAAGTGCCTCACGCTGACTTGTCTGGTTAC<br/>           ACCCATGACGGTCTTTCCAACAATACGCTACTGCTGACGCGGTGCAAGCCGCTCGTATTCCCAGAGGGACCGACTTGGCCAAAGTCGC<br/>           CCCATCTTGTGTGCTGGTATCACCGTATAACAAGCCTTGAAGTCTGCCAACTTGAGAGCAGGCCACTGGGTGGCCATTTCTGGTGTCTGC<br/>           TGGTGGTCTAGGTTCTTTGGCTGTTCAATATGCTAAGGCGATGGGTTACAGAGTCTTAGGTATTGATGGTGGTCCAGGAAAGGAAGAATT<br/>           GTTACCTCGCTCGGTGGTGAAGTATTCATCGACTTCAACCAAGAGAAGGACATTGTTAGCGCAGTCGTTAAGGCTACCAACGGCGGTG<br/>           CCCACGGTATCATCAATGTTTCCGTTTCCGAAGCCGCTATCGAAGCTTCTACCAGATACTGTAGGGCGAACGGTACTGTTGTCTTGGTTGG<br/>           TTTGCCAGCCGGTGCAAAGTGTCTCCTCTGATGTCTTCAACCACGTTGTCAAGTCTATCTCCATTGTCGGCTCTTACGTGGGGAACAGAGC<br/>           TGATACCAGAGAAGCCTTAGATTTCTTTGCCAGAGGTCTAGTCAAGTCTCCAATAAAGGTAGTTGGCTTATCCAGTTTACCAGAAATTTAC<br/>           GAAAAGATGGAGAAGGGCCAAATTGCTGGTAGATACGTTGTTGACACTTCTAAATAA<br/>           ATGCTTTCTCGCAAGAGCTGCAGCTCCGAATTCCAGAATATTCACTAGAAGCTTGTTACGTCTTTATTCTCAAGCACCATTACGCGTTC<br/>           CAATTACTCTTCCAAATGGTTTCACCTACGAACAGCCAACAGGGTTATTCATCAATGGTGAATTTGTTGCCTCGAAGCAAAAAGAAAACGT<br/>           TTGACGTGATCAATCCATCTAACGAAGAAAAGATAACAACCTGTATAACAAGGCTATGGAAGATGATGTTGATGAAGCCGTTGCAGCGGCTA<br/>           AAAAAGCTTTTGAACGAAGTGGTCTATTGTAGAGCCGGAGGTTTCGCGCTAAAGCTTTATTCAATCTCGCTGACTTGGTTGAGAAACAC<br/>           CAAGAAACACTGGCTGCCATTGAGTCAATGGATAATGGTAAGTCATTGTTTTGTGCGCGCGGTGACGTGCTTTAGTATCTAAATACTTGC<br/>           GTTCTTGCGGTGGTTGGGCAGATAAAATCTACGGTAACGTTATTGACACAGGTA AAAACCATTTTACCTACTCAATTAAGGAACCATTAG<br/>           GCGTTTGC GGCCAAATAATCCCTTGGAACCTCCCTTTATTGATGTGGTCATGGAAAATTGGGCCTGCTCTGGCTACAGGTAACACCGTCGT<br/>           ATTGAAACCCGCTGAAACCACCCATTGAGCGCTTTGTTTGCCAGTTGTGTCAGGAAGCAGGCATACCCGCTGGTGTAG<br/>           ATGCTTTCTCGCAAGAGCTGCAGCTCCGAATTCCAGAATATTCACTAGAAGCTTGTTACGTCTTTATTCTCAAGCACCATTACGCGTTC<br/>           CAATTACTCTTCCAAATGGTTTCACCTACGAACAGCCAACAGGGTTATTCATCAATGGTGAATTTGTTGCCTCGAAGCAAAAAGAAAACGT<br/>           TTGACGTGATCAACCCATCTAACGAAGAAAAGATAACAACCTGTATAACAAGGCTATGGAAGACGATGTTGATGAAGCCGTTGCAGCGGCT<br/>           AAAAAAGCTTTTGAACGAAGTGGTCTATTGTAGAGCCGGAGGTTTCGCGCTAAAGCTTTATTCAATCTCGCTGACTTGGTTGAGAAACA<br/>           CCAAGAAACACTGGCTGCCATTGAGTCAATGGATAATGGTAAGTCATTGTTTTGTGCGCGCGGTGACGTGCTTTAGTATCTAAATACTTGC<br/>           CGTCTTGCGGTGGTTGGGCAGATAAAATCTACGGTAACGTTATTGACACGGGTAAAACCATTTTACCTACTCAATTAAGGAACCATTAG<br/>           GCGTTTGC GGCCAAATAATCCCTTGGAACCTCCCTTTATTAATGTGGTCATGGAAAATTGGGCCTGCTCTGGCTACAGGTAACACCGTCGT<br/>           ATTGAAACCCGCTGAAACAACACCTTTATCTGCCCTTTTCGCTTCCCAGTTGTGTCAGGAAGCAGGCATACCCGCTGGTGTAGTCAATAT<br/>           CCTCCGGGTTCCGGTAGAGTTGTTGGAGAAAGATTGAGTGCACACCCAGACGTGAAGAAGATTGCTTTTACAGGCTCTACTGCCACCG<br/>           GCCGCCATATTATGAAGGTCGCTGCCGATACTGTCAAGAAAGTCACTTTGGAGCTGGGAGGTA AATCACC AAATATTGTGTTTGTGACG<br/>           CTGATTTAGATAAAGCCGTTAAGAACATTGCCTTCGGTATTTTTTACAACCTCCGGTGAAGTTTGTGTGCTGGTTCAGAAATATACATTCA</p> |
| Ald5* | <p>ATGCTTTCTCGCAAGAGCTGCAGCTCCGAATTCCAGAATATTCACTAGAAGCTTGTTACGTCTTTATTCTCAAGCACCATTACGCGTTC<br/>           CAATTACTCTTCCAAATGGTTTCACCTACGAACAGCCAACAGGGTTATTCATCAATGGTGAATTTGTTGCCTCGAAGCAAAAAGAAAACGT<br/>           TTGACGTGATCAATCCATCTAACGAAGAAAAGATAACAACCTGTATAACAAGGCTATGGAAGATGATGTTGATGAAGCCGTTGCAGCGGCTA<br/>           AAAAAGCTTTTGAACGAAGTGGTCTATTGTAGAGCCGGAGGTTTCGCGCTAAAGCTTTATTCAATCTCGCTGACTTGGTTGAGAAACAC<br/>           CAAGAAACACTGGCTGCCATTGAGTCAATGGATAATGGTAAGTCATTGTTTTGTGCGCGCGGTGACGTGCTTTAGTATCTAAATACTTGC<br/>           GTTCTTGCGGTGGTTGGGCAGATAAAATCTACGGTAACGTTATTGACACAGGTA AAAACCATTTTACCTACTCAATTAAGGAACCATTAG<br/>           GCGTTTGC GGCCAAATAATCCCTTGGAACCTCCCTTTATTGATGTGGTCATGGAAAATTGGGCCTGCTCTGGCTACAGGTAACACCGTCGT<br/>           ATTGAAACCCGCTGAAACCACCCATTGAGCGCTTTGTTTGCCAGTTGTGTCAGGAAGCAGGCATACCCGCTGGTGTAG<br/>           ATGCTTTCTCGCAAGAGCTGCAGCTCCGAATTCCAGAATATTCACTAGAAGCTTGTTACGTCTTTATTCTCAAGCACCATTACGCGTTC<br/>           CAATTACTCTTCCAAATGGTTTCACCTACGAACAGCCAACAGGGTTATTCATCAATGGTGAATTTGTTGCCTCGAAGCAAAAAGAAAACGT<br/>           TTGACGTGATCAACCCATCTAACGAAGAAAAGATAACAACCTGTATAACAAGGCTATGGAAGACGATGTTGATGAAGCCGTTGCAGCGGCT<br/>           AAAAAAGCTTTTGAACGAAGTGGTCTATTGTAGAGCCGGAGGTTTCGCGCTAAAGCTTTATTCAATCTCGCTGACTTGGTTGAGAAACA<br/>           CCAAGAAACACTGGCTGCCATTGAGTCAATGGATAATGGTAAGTCATTGTTTTGTGCGCGCGGTGACGTGCTTTAGTATCTAAATACTTGC<br/>           CGTCTTGCGGTGGTTGGGCAGATAAAATCTACGGTAACGTTATTGACACGGGTAAAACCATTTTACCTACTCAATTAAGGAACCATTAG<br/>           GCGTTTGC GGCCAAATAATCCCTTGGAACCTCCCTTTATTAATGTGGTCATGGAAAATTGGGCCTGCTCTGGCTACAGGTAACACCGTCGT<br/>           ATTGAAACCCGCTGAAACAACACCTTTATCTGCCCTTTTCGCTTCCCAGTTGTGTCAGGAAGCAGGCATACCCGCTGGTGTAGTCAATAT<br/>           CCTCCGGGTTCCGGTAGAGTTGTTGGAGAAAGATTGAGTGCACACCCAGACGTGAAGAAGATTGCTTTTACAGGCTCTACTGCCACCG<br/>           GCCGCCATATTATGAAGGTCGCTGCCGATACTGTCAAGAAAGTCACTTTGGAGCTGGGAGGTA AATCACC AAATATTGTGTTTGTGACG<br/>           CTGATTTAGATAAAGCCGTTAAGAACATTGCCTTCGGTATTTTTTACAACCTCCGGTGAAGTTTGTGTGCTGGTTCAGAAATATACATTCA</p>                                                                                                                                                                                                                                                                                                                                                                                                                                                                                                                                                                                                                                                                                                                                                                                                                                                                                                                                                                                                                                                                                                                                                                                                                                                                                  |
| Ald5# | <p>ATGCTTTCTCGCAAGAGCTGCAGCTCCGAATTCCAGAATATTCACTAGAAGCTTGTTACGTCTTTATTCTCAAGCACCATTACGCGTTC<br/>           CAATTACTCTTCCAAATGGTTTCACCTACGAACAGCCAACAGGGTTATTCATCAATGGTGAATTTGTTGCCTCGAAGCAAAAAGAAAACGT<br/>           TTGACGTGATCAACCCATCTAACGAAGAAAAGATAACAACCTGTATAACAAGGCTATGGAAGACGATGTTGATGAAGCCGTTGCAGCGGCT<br/>           AAAAAAGCTTTTGAACGAAGTGGTCTATTGTAGAGCCGGAGGTTTCGCGCTAAAGCTTTATTCAATCTCGCTGACTTGGTTGAGAAACA<br/>           CCAAGAAACACTGGCTGCCATTGAGTCAATGGATAATGGTAAGTCATTGTTTTGTGCGCGCGGTGACGTGCTTTAGTATCTAAATACTTGC<br/>           CGTCTTGCGGTGGTTGGGCAGATAAAATCTACGGTAACGTTATTGACACGGGTAAAACCATTTTACCTACTCAATTAAGGAACCATTAG<br/>           GCGTTTGC GGCCAAATAATCCCTTGGAACCTCCCTTTATTAATGTGGTCATGGAAAATTGGGCCTGCTCTGGCTACAGGTAACACCGTCGT<br/>           ATTGAAACCCGCTGAAACAACACCTTTATCTGCCCTTTTCGCTTCCCAGTTGTGTCAGGAAGCAGGCATACCCGCTGGTGTAGTCAATAT<br/>           CCTCCGGGTTCCGGTAGAGTTGTTGGAGAAAGATTGAGTGCACACCCAGACGTGAAGAAGATTGCTTTTACAGGCTCTACTGCCACCG<br/>           GCCGCCATATTATGAAGGTCGCTGCCGATACTGTCAAGAAAGTCACTTTGGAGCTGGGAGGTA AATCACC AAATATTGTGTTTGTGACG<br/>           CTGATTTAGATAAAGCCGTTAAGAACATTGCCTTCGGTATTTTTTACAACCTCCGGTGAAGTTTGTGTGCTGGTTCAGAAATATACATTCA</p>                                                                                                                                                                                                                                                                                                                                                                                                                                                                                                                                                                                                                                                                                                                                                                                                                                                                                                                                                                                                                                                                                                                                                                                                                                                                                                                                                                                                                                                                                                                                                                                                                                                                                                                                                                                                                                                                                                                                                                                                                                                                                                                                                          |

---

AGATACAGTATACGAGGAGGTGTTGCAAAAACATAAAGGATTACACCGAGTCACTAAAGGTCGGTGACCCATTTGATGAGGAAGTTTTCC  
AAGGTGCTCAAACATCTGACAAACAGCTGCATAAAATTTTAGACTATGTCGATGTAGCAAAATCAGAGGGGGCTCGTCTTGTGACTGGA  
GGTGCCAGACATGGCAGTAAAGGTTATTTTGTCAAGCCAACAGTGTTTGCTGATGTCAAAGAAGATATGAGAATTGTTAAGGAGGAAGT  
GTTTGGTCCCATTGTAAGTGTATCCAAGTTTTCTACTGTTGATGAAGTGATTGCTATGGCAAATGATTCTCAATATGGGTAGCCGCAGGTA  
TTCACACTAACGATATTAACAAGGCTGTTGATGTGTCCAAAAGAGTGAAAGCTGGTACTGTTTGGATAAATACCTATAACAACACTCCACC  
AAAATGTTCTTTTCGGTGGCTTCGGCCAGTCAGGTATTGGCCGTGAAATGGGTGAGGCTGCTTTAAGTAACTACTCAAACAAAATCTG  
TCAGAATTGCCATTGACAAGCCAATTCGTTGA

---



## Supplementary Data

Data S1. (separate file)

Processed comparative genomics data. Specific SNP, INDEL, CNV and SV information are listed for strains SCSEA001 and SCSEA003 relative to the control SCDM001.

Data S2. (separate file)

Processed transcriptome data. Gene id, fold change,  $\log_2$ foldchange, *P* value, gene names and functional annotations are listed. The control group (Y\_2) was cultured in Delft MM supplemented with 0.1% yeast extract. The test group (MY\_2) was cultured in Delft MM supplemented with 0.1% yeast extract and 2% methanol.
